# Supplementary material
Source: publisher figshare collection journal article supplement (https://gsapubs.figshare.com/ndownloader/files/23308148)
Supplement: Supplementary file 1 [file 23308148]

## Sheet: DR1.U-Pb tuff LAICPMS (UA) data
Supplemental Table. U-Pb geochronologic analyses.
							Isotope ratios						Apparent ages (Ma)
Analysis	U	206Pb	U/Th	206Pb*	±	207Pb*	±	206Pb*	±	error	206Pb*	±	207Pb*	±	206Pb*	±	Best age	±	Conc
	(ppm)	204Pb		207Pb*	(%)	235U*	(%)	238U	(%)	corr.	238U*	(Ma)	235U	(Ma)	207Pb*	(Ma)	(Ma)	(Ma)	(%)
12ZA16-20.1 <>	416.418	4587.03	0.7477	18.8342	4.64002	0.303412	4.79403	0.0414457	1.20539	0.251435	261.788	3.09234	269.062	11.3318	332.829	105.253	261.788	3.09234	NA	*	* indicates analysis was utilized for weighted average and concordia
12ZA16-17.2 <>	271.383	3560.91	0.719307	17.9828	13.1705	0.319162	13.9856	0.0416261	4.70459	0.336389	262.905	12.1198	281.258	34.3707	436.762	294.347	262.905	12.1198	NA	*
12ZA16-19 <>	326.966	7226.87	0.665868	19.5344	4.14588	0.296402	7.68346	0.0419934	6.46894	0.841931	265.177	16.8062	263.586	17.8391	249.454	95.4434	265.177	16.8062	NA	*
12ZA16-28 <>	227.153	8370.09	1.05574	19.2507	4.38232	0.301763	4.92198	0.042132	2.24079	0.455263	266.034	5.83995	267.776	11.5857	283.06	100.292	266.034	5.83995	NA	*
12ZA16-5 <>	255.326	35869.4	1.2692	19.319	5.18736	0.301801	5.81817	0.0422867	2.63486	0.452867	266.991	6.89116	267.806	13.6968	274.915	118.885	266.991	6.89116	NA	*
12ZA16-15.2 <>	283.424	23658.1	0.851241	20.1141	4.72922	0.290134	5.23102	0.0423251	2.23564	0.427382	267.229	5.85215	258.664	11.9454	181.727	110.242	267.229	5.85215	NA	*
12ZA16-26 <>	394.828	29605.6	1.15532	19.2388	3.61927	0.30442	3.96778	0.0424767	1.6261	0.409826	268.166	4.27119	269.847	9.40256	284.453	82.7819	268.166	4.27119	NA	*
12ZA16-17.3 <>	370.965	19905.2	1.1106	19.8393	3.74992	0.29547	4.19838	0.0425145	1.88798	0.449692	268.4	4.9633	262.856	9.72323	213.738	86.8686	268.4	4.9633	NA	*
12ZA16-29 <>	265.445	6206.27	0.755081	19.9325	4.35347	0.294411	4.41103	0.0425612	0.71029	0.161026	268.689	1.86925	262.025	10.1875	202.838	101.08	268.689	1.86925	NA	*
12ZA16-23.2 <>	207.126	5166.95	1.54009	18.5833	8.8281	0.316225	9.15862	0.0426205	2.43824	0.266223	269.055	6.42519	278.995	22.3458	363.156	199.451	269.055	6.42519	NA	*
12ZA16-10 <>	459.267	2362.25	1.33613	18.9732	6.70393	0.310957	6.87022	0.0427897	1.50238	0.21868	270.102	3.97412	274.923	16.5482	316.138	152.621	270.102	3.97412	NA	*
12ZA16-25 <>	497.92	4943.39	0.774375	19.4056	5.75577	0.304219	5.95231	0.0428165	1.51696	0.254852	270.267	4.01509	269.69	14.0987	264.676	132.183	270.267	4.01509	NA	*
12ZA16-4 <>	368.899	7689.15	0.950616	19.8649	8.44403	0.297454	8.54194	0.0428553	1.28961	0.150974	270.507	3.41631	264.41	19.887	210.741	196.01	270.507	3.41631	NA	*
12ZA16-18 <>	281.506	342.217	0.589752	15.2712	28.8162	0.386942	29.0968	0.0428567	4.03112	0.138542	270.516	10.6792	332.133	82.6075	789.859	616.922	270.516	10.6792	NA
12ZA16-32 <>	193.62	2849.08	0.881611	18.2229	20.4193	0.324977	22.3847	0.0429505	9.1721	0.409748	271.096	24.3497	285.724	55.8037	407.154	461.217	271.096	24.3497	NA
12ZA16-8 <>	293.523	1573.81	0.799674	18.2844	10.1425	0.324361	10.5235	0.0430137	2.80586	0.266629	271.486	7.45936	285.251	26.1763	399.615	227.807	271.486	7.45936	NA	*
12ZA16-27 <>	348.388	55247.8	1.54551	19.4856	3.6312	0.304653	4.78759	0.0430544	3.12016	0.651718	271.738	8.30245	270.028	11.3521	255.223	83.5301	271.738	8.30245	NA	*
12ZA16-23 <>	319.296	41183.9	1.03424	19.4646	3.19194	0.305039	3.41757	0.0430625	1.22118	0.357323	271.788	3.25002	270.328	8.11124	257.694	73.3902	271.788	3.25002	NA	*
12ZA16-24 <>	399.764	39268.8	1.26187	19.7851	2.28575	0.300263	2.76512	0.0430863	1.55602	0.562733	271.935	4.14336	266.606	6.48366	220.051	52.8941	271.935	4.14336	NA	*
12ZA16-6 <>	301.015	51613.8	1.4368	18.8084	2.64184	0.315961	3.67101	0.0431006	2.54892	0.694337	272.024	6.78941	278.791	8.94988	335.968	59.8533	272.024	6.78941	NA	*
12ZA16-30 <>	241.442	8118.34	0.613578	19.5584	11.6135	0.305232	11.7361	0.0432973	1.6917	0.144146	273.239	4.5258	270.478	27.8742	246.627	268.178	273.239	4.5258	NA	*
12ZA16-1.2 <>	243.439	3927.28	1.18743	20.0314	5.9511	0.298097	8.52614	0.043308	6.10569	0.716114	273.305	16.3384	264.913	19.8833	191.364	138.538	273.305	16.3384	NA	*
12ZA16-20 <>	274.866	13454.2	1.30791	19.5457	5.56596	0.305578	5.74678	0.0433183	1.43025	0.248878	273.368	3.82811	270.748	13.6584	248.151	128.199	273.368	3.82811	NA	*
12ZA16-16 <>	299.215	17268.3	0.670084	19.735	7.25026	0.30278	7.4529	0.0433375	1.72613	0.231605	273.487	4.62201	268.569	17.5896	225.904	167.768	273.487	4.62201	NA	*
12ZA16-17.1 <>	319.072	1759.59	0.789289	19.1054	8.55987	0.314014	8.76462	0.0435114	1.88341	0.214887	274.562	5.06254	277.288	21.2704	300.372	195.538	274.562	5.06254	NA	*
12ZA16-31 <>	273.07	22024.4	1.2663	20.1678	4.35464	0.297497	4.56107	0.043515	1.35661	0.297433	274.584	3.64682	264.443	10.6191	175.521	101.632	274.584	3.64682	NA	*
12ZA16-11 <>	124.965	2166.96	1.05099	21.9961	10.2344	0.274245	10.5929	0.0437506	2.73247	0.257952	276.039	7.38347	246.082	23.153	-30.7767	248.668	276.039	7.38347	NA	*
12ZA16-12 <>	442.81	8463.51	1.37202	19.7658	3.98791	0.305734	4.15877	0.0438285	1.17982	0.283695	276.52	3.19347	270.869	9.88777	222.329	92.2541	276.52	3.19347	NA	*
12ZA16-16.2 <>	486.952	14460.1	0.483104	19.4401	2.792	0.310956	3.04935	0.0438425	1.22607	0.402077	276.607	3.31967	274.921	7.34438	260.623	64.1395	276.607	3.31967	NA	*
12ZA16-22 <>	182.422	1664.39	1.20698	18.6859	5.84039	0.325169	5.98305	0.0440678	1.29872	0.217066	277.998	3.53367	285.871	14.9081	350.732	132.078	277.998	3.53367	NA	*
12ZA16-21 <>	214.541	3310.16	1.13731	19.2414	6.66111	0.316033	7.09254	0.0441029	2.43593	0.34345	278.215	6.63295	278.846	17.2957	284.133	152.473	278.215	6.63295	NA	*
12ZA16-15 <>	405.948	11277.6	1.44994	19.9593	3.0968	0.305992	3.47231	0.0442949	1.57058	0.452316	279.4	4.29446	271.069	8.26089	199.743	71.9113	279.4	4.29446	NA	*
12ZA16-9 <>	539.248	9265.5	0.811135	15.9716	17.2577	0.385754	17.2863	0.0446845	0.994666	0.0575407	281.804	2.74263	331.263	48.8981	695.077	370.348	281.804	2.74263	NA
12ZA16-14 <>	178.066	3437.54	0.922703	20.4563	8.53125	0.311361	8.80159	0.0461945	2.16464	0.245937	291.116	6.16143	275.236	21.2225	142.296	200.534	291.116	6.16143	NA
12ZA16-7 <>	309.11	22034.1	0.977238	19.3335	2.20711	0.340034	2.7613	0.0476794	1.65935	0.60093	300.259	4.86808	297.198	7.11471	273.196	50.5748	300.259	4.86808	NA
12ZA16-13 <>	549.747	1220.24	2.1166	17.6358	6.51282	0.528953	6.58065	0.0676567	0.942378	0.143204	422.022	3.84966	431.115	23.1205	479.977	144.049	422.022	3.84966	87.9255
12ZA10-16 <>	680.831	3223.27	0.950228	18.5698	8.45982	0.305685	9.87227	0.0411699	5.08853	0.515436	260.081	12.9709	270.831	23.4725	364.797	191.036	260.081	12.9709	NA
12ZA10-18 <>	579.792	3237.75	0.928276	19.4665	3.71982	0.293213	3.95863	0.041397	1.35413	0.34207	261.487	3.47001	261.085	9.11378	257.483	85.5289	261.487	3.47001	NA
12ZA10-1 <>	198.671	11452.5	1.30309	20.331	8.44828	0.287087	8.90043	0.0423321	2.80074	0.314675	267.272	7.33256	256.264	20.1606	156.708	198.034	267.272	7.33256	NA
12ZA10-25 <>	278.037	2032.93	1.44352	19.1134	4.66732	0.306023	6.06319	0.0424221	3.87019	0.63831	267.829	10.1531	271.094	14.4266	299.366	106.485	267.829	10.1531	NA
12ZA10-24.1 <>	556.816	26618	1.20056	19.9083	3.39368	0.294163	3.60918	0.0424737	1.22846	0.340372	268.148	3.22653	261.831	8.33004	205.658	78.737	268.148	3.22653	NA
12ZA10-18.2 <>	439.456	478.574	0.679927	17.7879	13.6482	0.329361	14.0703	0.0424908	3.42083	0.243124	268.254	8.9882	289.078	35.4111	460.97	303.835	268.254	8.9882	NA
12ZA10-24.2 <>	512.312	36540.7	1.31213	19.0157	2.78633	0.308546	2.85828	0.0425531	0.637265	0.222954	268.639	1.67676	273.053	6.8434	311.051	63.4202	268.639	1.67676	NA
12ZA10-23 <>	772.297	4285.85	0.865381	18.9123	2.2631	0.31244	2.32013	0.0428558	0.511235	0.220348	270.511	1.35433	276.071	5.60832	323.449	51.4032	270.511	1.35433	NA
12ZA10-21 <>	556.219	2623.04	1.03056	18.3846	8.03196	0.32193	8.07497	0.0429253	0.832331	0.103075	270.94	2.20838	283.386	19.9701	387.351	180.617	270.94	2.20838	NA
12ZA10-14.2 <>	811.069	16978.9	0.957198	19.5863	2.45761	0.302481	2.70302	0.0429685	1.12537	0.41634	271.207	2.98878	268.336	6.37399	243.381	56.653	271.207	2.98878	NA	*
12ZA10-9 <>	382.179	2272.51	1.06771	18.7051	8.19059	0.316917	8.34901	0.0429936	1.61871	0.19388	271.362	4.3014	279.528	20.4038	348.405	185.479	271.362	4.3014	NA	*
12ZA10-22 <>	974.41	30582.5	1.83931	18.9363	2.11973	0.313457	2.34139	0.0430498	0.99442	0.424713	271.709	2.64578	276.857	5.67375	320.609	48.1711	271.709	2.64578	NA	*
12ZA10-28 <>	672.756	660.269	1.00031	17.5554	14.1379	0.338182	14.1718	0.0430585	0.979746	0.0691336	271.763	2.60725	295.793	36.381	490.084	313.261	271.763	2.60725	NA	*
12ZA10-8.2 <>	423.87	8645.4	1.45455	20.132	3.75519	0.296864	3.95213	0.0433454	1.23204	0.311741	273.536	3.29958	263.948	9.18623	179.66	87.5439	273.536	3.29958	NA	*
12ZA10-18.2 <>	767.269	22328.7	1.23629	19.36	2.07927	0.308886	2.26491	0.0433714	0.898031	0.396498	273.697	2.40643	273.317	5.42726	270.047	47.6645	273.697	2.40643	NA	*
12ZA10-4.1 <>	705.562	13318.7	0.787733	19.3048	3.08846	0.310757	3.32999	0.0435097	1.24507	0.373896	274.551	3.34658	274.768	8.01642	276.635	70.7478	274.551	3.34658	NA	*
12ZA10-6 <>	335.95	8066.35	1.26956	18.9036	6.6377	0.318081	6.76838	0.0436096	1.3236	0.195557	275.168	3.56549	280.425	16.5863	324.497	150.867	275.168	3.56549	NA	*
12ZA10-17 <>	338.045	2023.78	1.33069	19.2846	6.19373	0.311937	6.46824	0.043629	1.86436	0.288233	275.288	5.02433	275.681	15.6172	279.039	141.895	275.288	5.02433	NA	*
12ZA10-14 <>	692.604	9113.73	0.973812	19.3242	1.89863	0.311832	2.79908	0.0437041	2.0567	0.734779	275.752	5.55181	275.6	6.75607	274.291	43.5043	275.752	5.55181	NA	*
12ZA10-26 <>	783.244	110045	1.84052	19.2467	1.03977	0.313287	1.7965	0.0437318	1.46503	0.815489	275.923	3.95707	276.726	4.35155	283.54	23.7943	275.923	3.95707	NA	*
12ZA10-8.1 <>	630.536	31727.1	1.19731	19.4033	1.92104	0.311279	2.20895	0.0438051	1.09044	0.493647	276.376	2.95002	275.172	5.32444	264.938	44.1046	276.376	2.95002	NA	*
12ZA10-11 <>	306.182	8121.64	1.22577	20.4197	3.65851	0.296383	4.82656	0.0438935	3.14817	0.65226	276.922	8.53337	263.571	11.2048	146.531	85.8255	276.922	8.53337	NA	*
12ZA10-13 <>	516.254	71029.1	0.97062	19.5314	1.83578	0.310304	1.9983	0.0439562	0.789366	0.39502	277.309	2.14257	274.417	4.80517	249.845	42.2383	277.309	2.14257	NA	*
12ZA10-5.1 <>	552.328	2451.36	1.20933	19.0138	3.93662	0.318764	4.31547	0.043958	1.76813	0.409718	277.32	4.79939	280.952	10.592	311.282	89.6205	277.32	4.79939	NA	*
12ZA10-5.2 <>	591.286	3401.73	1.2543	19.3559	2.1761	0.314196	2.84224	0.0441075	1.82837	0.643284	278.243	4.97908	277.428	6.89983	270.541	49.8993	278.243	4.97908	NA	*
12ZA10-12.1 <>	797.09	669.324	0.895292	17.9923	12.1894	0.338009	12.2773	0.0441076	1.46644	0.119444	278.244	3.99349	295.662	31.5022	435.583	272.323	278.244	3.99349	NA	*
12ZA10-29.1 <>	813.806	811.448	1.04028	18.1613	4.64368	0.335837	4.839	0.0442359	1.36092	0.281239	279.036	3.71643	294.012	12.3533	414.72	103.807	279.036	3.71643	NA	*
12ZA10-27 <>	382.144	29302.7	1.29421	19.241	2.73364	0.317503	3.23748	0.0443072	1.73449	0.535754	279.476	4.74391	279.98	7.92212	284.209	62.5226	279.476	4.74391	NA	*
12ZA10-29.2 <>	268.341	2124.44	1.56043	18.4947	6.72996	0.330606	6.95045	0.0443461	1.7368	0.249883	279.716	4.75421	290.029	17.5367	373.932	151.656	279.716	4.75421	NA	*
12ZA10-12.2 <>	290.377	9864.02	1.45159	19.2497	4.6486	0.317645	5.81203	0.0443471	3.48858	0.600234	279.722	9.54964	280.09	14.2275	283.183	106.389	279.722	9.54964	NA	*
12ZA10-10.3 <>	392.036	2316.57	0.929515	19.7581	7.55952	0.309816	7.688	0.0443963	1.39968	0.182061	280.026	3.83557	274.038	18.4665	223.184	175.017	280.026	3.83557	NA	*
12ZA10-4.2 <>	218.062	3202.6	1.3964	19.8319	7.45904	0.30896	7.59698	0.0444391	1.44114	0.189699	280.29	3.95281	273.375	18.2093	214.601	172.942	280.29	3.95281	NA	*
12ZA10-10.2 <>	296.148	5269.36	0.579148	19.6965	3.75348	0.31134	4.31835	0.0444758	2.13531	0.494474	280.517	5.86145	275.219	10.4108	230.394	86.7102	280.517	5.86145	NA	*
12ZA10-2 <>	398.207	23482.8	0.939722	19.4243	4.21001	0.315799	4.41446	0.0444893	1.32787	0.3008	280.6	3.64607	278.666	10.7583	262.48	96.7024	280.6	3.64607	NA	*
12ZA10-20 <>	366.457	8962.02	1.42236	19.5999	4.00206	0.313248	4.21609	0.0445288	1.32624	0.314566	280.844	3.64469	276.695	10.2116	241.776	92.2666	280.844	3.64469	NA
12ZA10-3 <>	298.153	3706.7	1.959	19.8908	3.75321	0.309337	4.13233	0.0446254	1.72905	0.418419	281.44	4.76154	273.667	9.91332	207.69	87.0494	281.44	4.76154	NA
12ZA10-10 <>	317.067	526.71	0.730872	17.3157	19.688	0.357258	20.7079	0.0448662	6.41888	0.309972	282.926	17.768	310.165	55.4008	520.313	435.889	282.926	17.768	NA
12ZA10-7 <>	545.005	4805.01	1.16148	19.0001	4.01334	0.330697	5.04926	0.0455706	3.06401	0.606823	287.27	8.60875	290.098	12.7418	312.937	91.333	287.27	8.60875	NA
12ZA08-6 <>	78.0887	2793.86	1.08599	20.2931	14.4149	0.282656	14.7471	0.0416011	3.11255	0.211062	262.75	8.0138	252.762	33.0094	161.084	338.66	262.75	8.0138	NA
12ZA08-3 <>	164.456	20138.5	0.903455	19.36	4.77533	0.304383	4.866	0.0427391	0.93494	0.192138	269.789	2.47031	269.818	11.5302	270.047	109.533	269.789	2.47031	NA
12ZA08-2 <>	115.536	1405.26	0.867247	18.6172	9.48129	0.326181	9.77187	0.0440425	2.36528	0.24205	277.841	6.43211	286.646	24.4089	359.051	214.379	277.841	6.43211	NA
12ZA08-5.2 <>	144.296	8465.71	0.991518	20.1079	11.4702	0.302618	11.9224	0.0441328	3.25242	0.2728	278.399	8.86199	268.443	28.1308	182.444	267.966	278.399	8.86199	NA
12ZA08-7 <>	59.5911	1865.57	0.97196	23.413	18.6918	0.295411	20.0854	0.050163	7.35131	0.366002	315.522	22.6366	262.81	46.5409	-184.39	470.307	315.522	22.6366	NA
12ZA08-5.1 <>	42.1301	1541.94	0.443427	18.5335	9.76561	0.439075	10.3191	0.0590194	3.33422	0.323111	369.659	11.9786	369.6	31.9795	369.209	220.447	369.659	11.9786	NA
12ZA60-12.1 <>	235.589	1785.67	0.987354	19.2396	4.60041	0.28912	5.53116	0.0403435	3.07083	0.555186	254.962	7.67662	257.867	12.5966	284.339	105.262	254.962	7.67662	NA
12ZA60-12.3 <>	190.017	3398.56	0.969756	19.5487	9.26348	0.286868	9.4509	0.0406723	1.8728	0.198161	256.999	4.71838	256.091	21.3952	247.776	213.635	256.999	4.71838	NA
12ZA60-12.2 <>	267.381	2294.68	0.739076	18.9856	5.04442	0.298905	6.55409	0.0411582	4.18448	0.638454	260.008	10.6635	265.544	15.3155	314.666	114.792	260.008	10.6635	NA
12ZA60-11 <>	592.824	3168.54	0.728973	18.3283	6.69257	0.312536	6.99834	0.0415453	2.04603	0.29236	262.404	5.26107	276.145	16.9221	394.231	150.241	262.404	5.26107	NA
12ZA60-17 <>	289.459	106090	1.12812	18.9855	3.9163	0.303168	4.1647	0.041745	1.4168	0.340193	263.64	3.65991	268.871	9.83807	314.674	89.0998	263.64	3.65991	NA
12ZA60-3 <>	254.182	12676.8	1.16444	19.9502	4.5107	0.291014	4.91516	0.0421076	1.95253	0.397246	265.884	5.08584	259.357	11.2504	200.772	104.803	265.884	5.08584	NA
12ZA60-16 <>	231.902	40529.2	1.06108	19.6039	5.27002	0.296484	5.71771	0.0421543	2.21788	0.387897	266.173	5.78319	263.65	13.2773	241.3	121.531	266.173	5.78319	NA
12ZA60-2.2 <>	248.995	16124.8	1.39267	19.6612	4.52623	0.296008	4.5921	0.0422098	0.774993	0.168767	266.516	2.02336	263.278	10.6501	234.583	104.506	266.516	2.02336	NA
12ZA60-24 <>	410.643	49051.1	1.18886	19.6361	3.84272	0.298099	4.08785	0.0424537	1.39429	0.34108	268.024	3.66041	264.915	9.53216	237.53	88.6567	268.024	3.66041	NA
12ZA60-17.2 <>	261.221	45106.8	1.15895	19.5532	5.48567	0.302098	5.63372	0.0428414	1.28306	0.227747	270.422	3.3979	268.037	13.2725	247.282	126.384	270.422	3.3979	NA
12ZA60-8 <>	409.9	25118.9	1.03708	19.4978	2.97425	0.303176	3.46981	0.0428725	1.78702	0.51502	270.614	4.73583	268.878	8.19666	253.798	68.4326	270.614	4.73583	NA
12ZA60-13 <>	396.878	14425.2	0.886024	19.6875	3.59465	0.300656	3.86756	0.0429297	1.42705	0.36898	270.967	3.7867	266.912	9.0779	231.458	83.0336	270.967	3.7867	NA
12ZA60-10 <>	289.389	9183.55	1.26483	19.1383	3.76315	0.310012	4.02489	0.043031	1.42774	0.354727	271.593	3.79709	274.19	9.67164	296.427	85.8834	271.593	3.79709	NA
12ZA60-15 <>	295.475	34990.7	0.800351	19.7633	4.18968	0.300266	4.23938	0.0430391	0.647237	0.152673	271.643	1.72165	266.608	9.94076	222.595	96.9313	271.643	1.72165	NA
12ZA60-20 <>	383.746	31595.5	1.5182	19.1764	3.13348	0.30975	3.45568	0.04308	1.45708	0.421646	271.896	3.87935	273.987	8.29843	291.907	71.5606	271.896	3.87935	NA
12ZA60-27 <>	286.722	43945.1	1.44893	19.3438	5.10188	0.307808	5.30235	0.0431838	1.44421	0.272371	272.538	3.85397	272.481	12.6723	271.968	117.004	272.538	3.85397	NA
12ZA60-7 <>	185.26	21776.7	1.26905	19.3578	3.9588	0.307605	4.6675	0.0431866	2.47254	0.529735	272.555	6.59855	272.323	11.1493	270.307	90.7993	272.555	6.59855	NA
12ZA60-24.2 <>	280.597	72936.7	1.16506	20.1481	2.66985	0.29824	3.36443	0.0435811	2.04727	0.608504	274.992	5.51145	265.025	7.84805	177.8	62.2666	274.992	5.51145	NA
12ZA60-9 <>	159.344	2778.74	1.51914	18.4785	7.8917	0.325622	7.9972	0.0436393	1.29472	0.161897	275.352	3.48998	286.218	19.9488	375.901	177.803	275.352	3.48998	NA
12ZA60-23 <>	396.76	27212.2	1.20581	20.2984	2.02266	0.296949	3.06111	0.0437162	2.29765	0.750596	275.827	6.20387	264.014	7.11663	160.469	47.304	275.827	6.20387	NA
12ZA60-3.2 <>	247.399	14906.5	1.18765	19.5606	5.53698	0.310001	5.69462	0.0439789	1.33063	0.233663	277.449	3.61349	274.182	13.684	246.407	127.58	277.449	3.61349	NA
12ZA60-19 <>	342.046	18709.1	1.48614	18.6886	3.34043	0.324997	5.34943	0.0440509	4.17826	0.781067	277.893	11.3644	285.739	13.3238	350.434	75.5211	277.893	11.3644	NA
12ZA60-5 <>	110.608	17360.6	1.1882	21.1077	15.6678	0.288177	15.8832	0.0441162	2.6069	0.16413	278.297	7.10055	257.123	36.0938	68.2394	374.769	278.297	7.10055	NA
12ZA60-2 <>	141.26	6107.83	1.49892	20.5782	10.8459	0.298268	11.0834	0.0445155	2.28218	0.20591	280.762	6.26996	265.046	25.8606	128.369	255.831	280.762	6.26996	NA
12ZA60-4 <>	186.566	6404.73	1.44434	19.84	6.49224	0.31755	7.2476	0.0456932	3.22157	0.444502	288.026	9.07474	280.016	17.7384	213.657	150.516	288.026	9.07474	NA
12ZA60-24.3 <>	180.404	2784.13	0.919907	20.6999	4.3704	0.312816	4.80804	0.0469631	2.00419	0.416842	295.849	5.79539	276.361	11.6333	114.469	103.166	295.849	5.79539	NA
12ZA60-14 <>	248.924	5604.34	2.67111	17.8341	2.14106	0.580348	2.39053	0.0750652	1.06326	0.444778	466.6	4.78586	464.685	8.91398	455.252	47.5241	466.6	4.78586	102.493
12ZA60-18 <>	150.406	25360.6	2.2901	17.7018	4.47725	0.614337	4.75491	0.0788721	1.60107	0.33672	489.387	7.54541	486.292	18.3752	471.728	99.1392	489.387	7.54541	103.743
12ZA60-26 <>	508.811	7124.11	2.54492	13.3223	0.714962	1.69734	3.03786	0.164001	2.95252	0.971911	978.972	26.8168	1007.53	19.4126	1070.19	14.3667	1070.19	14.3667	91.4768

## Sheet: DR2. U-Pb DZ LAICPMS (UA)
Table 2. U-Pb geochronologic analyses.
							Isotope ratios						Apparent ages (Ma)
Analysis	U	206Pb	U/Th	206Pb*	±	207Pb*	±	206Pb*	±	error	206Pb*	±	207Pb*	±	206Pb*	±	Best age	±	Conc
	(ppm)	204Pb		207Pb*	(%)	235U*	(%)	238U	(%)	corr.	238U*	(Ma)	235U	(Ma)	207Pb*	(Ma)	(Ma)	(Ma)	(%)
09BLC1-23 <>	69.0005	10353.7	1.35419	19.8618	19.7935	0.291339	20.309	0.0419677	4.54675	0.223879	265.018	11.8054	259.613	46.5565	211.069	462.652	265.018	11.8054	NA
09BLC1-15 <>	143.763	5235.74	1.39769	18.6027	8.21276	0.319281	8.60824	0.0430773	2.57924	0.299624	271.879	6.86659	281.349	21.1565	360.802	185.574	271.879	6.86659	NA
09BLC1-2 <>	531.557	3889.69	2.98755	18.6878	6.72843	0.318153	7.75966	0.0431215	3.86531	0.498128	272.152	10.3006	280.481	19.0193	350.535	152.238	272.152	10.3006	NA
09BLC1-100 <>	253.803	1844.38	0.837293	19.2574	9.25782	0.309043	9.47717	0.0431634	2.0272	0.213904	272.411	5.40727	273.439	22.722	282.266	212.228	272.411	5.40727	NA
09BLC1-7 <>	171.089	15800.9	0.909907	19.1737	7.50968	0.311179	7.867	0.0432728	2.34401	0.297955	273.088	6.26751	275.094	18.96	292.196	171.74	273.088	6.26751	NA
09BLC1-18 <>	108.215	23624.8	1.40198	20.0729	8.78318	0.298009	8.95134	0.0433848	1.72688	0.192919	273.779	4.62886	264.844	20.8704	186.51	204.788	273.779	4.62886	NA
09BLC1-33 <>	89.2341	10994.4	0.892878	20.642	21.9752	0.29206	22.1155	0.0437243	2.48771	0.112487	275.877	6.71824	260.179	50.8018	121.071	523.242	275.877	6.71824	NA
09BLC1-28 <>	98.2008	8750.11	0.682794	20.9901	19.1317	0.288423	19.2014	0.043908	1.63443	0.0851202	277.011	4.43165	257.318	43.6719	81.4812	457.691	277.011	4.43165	NA
09BLC1-67 <>	302.808	36081.8	1.54464	19.308	3.39873	0.313933	3.54783	0.0439616	1.01771	0.286855	277.342	2.76268	277.225	8.60729	276.215	77.853	277.342	2.76268	NA
09BLC1-99 <>	330.279	37308.5	1.13531	19.7203	3.79487	0.30765	5.09185	0.0440017	3.39498	0.666747	277.59	9.22409	272.358	12.1644	227.634	87.6886	277.59	9.22409	NA
09BLC1-84 <>	143.445	17511.2	1.52909	18.2455	5.1929	0.333616	6.64484	0.0441471	4.1458	0.623913	278.488	11.2997	292.323	16.8799	404.376	116.332	278.488	11.2997	NA
09BLC1-48 <>	401.085	52000.1	0.925398	19.175	1.7471	0.318286	2.04526	0.0442641	1.06337	0.519918	279.21	2.90565	280.583	5.01408	292.047	39.8995	279.21	2.90565	NA
09BLC1-76 <>	234.715	15800.2	0.789858	18.3846	5.06289	0.335193	5.19662	0.0446939	1.17132	0.225401	281.862	3.23038	293.522	13.2472	387.344	113.766	281.862	3.23038	NA
09BLC1-93 <>	135.415	10802.6	0.993547	19.1949	6.39032	0.325341	6.64924	0.0452921	1.83745	0.276339	285.553	5.13237	286.003	16.5749	289.699	146.118	285.553	5.13237	NA
09BLC1-83 <>	114.832	10280.6	1.67627	18.5164	6.31273	0.339364	7.63526	0.0455743	4.29496	0.562516	287.293	12.0682	296.689	19.646	371.288	142.283	287.293	12.0682	NA
09BLC1-41 <>	102.37	19594.3	1.15038	19.3224	11.5044	0.328661	11.7251	0.0460582	2.26419	0.193107	290.276	6.42661	288.543	29.4578	274.511	264.313	290.276	6.42661	NA
09BLC1-50 <>	347.92	34704.4	1.12158	19.0363	3.66977	0.33738	3.73833	0.0465802	0.712701	0.190647	293.491	2.04482	295.185	9.57603	308.623	83.5839	293.491	2.04482	NA
09BLC1-12 <>	196.149	20906.4	1.40571	19.2066	7.68598	0.337802	7.80008	0.0470557	1.32926	0.170416	296.42	3.85096	295.505	20.0012	288.293	175.889	296.42	3.85096	NA
09BLC1-6 <>	232.955	52952.3	1.41527	19.5043	4.48258	0.341906	4.65047	0.0483654	1.23829	0.266272	304.478	3.68268	298.615	12.0318	253.048	103.134	304.478	3.68268	NA
09BLC1-40 <>	139.091	13500.6	1.37611	19.8648	9.88733	0.337991	10.1006	0.0486954	2.06464	0.204408	306.507	6.18018	295.648	25.9133	210.746	229.621	306.507	6.18018	NA
09BLC1-96 <>	326.435	25104.3	11.6483	18.3945	2.26507	0.429253	3.39823	0.0572664	2.53327	0.745467	358.98	8.84537	362.646	10.3634	386.142	50.8639	358.98	8.84537	NA
09BLC1-53 <>	181.316	3219.49	1.75944	17.7529	9.31176	0.457146	9.40738	0.0588604	1.33788	0.142216	368.691	4.79423	382.271	29.9762	465.368	206.673	368.691	4.79423	NA
09BLC1-17 <>	338.16	8099.64	0.921723	17.614	3.41082	0.501747	4.1301	0.0640977	2.32895	0.563897	400.498	9.04357	412.885	14.0122	482.746	75.3531	400.498	9.04357	82.9624
09BLC1-69 <>	101.496	25216.2	1.42521	18.913	9.29502	0.467322	9.45807	0.0641026	1.7486	0.18488	400.527	6.7905	389.337	30.5953	323.386	211.484	400.527	6.7905	123.854
09BLC1-49 <>	285.423	3772.92	1.75594	18.124	3.98274	0.496521	6.51233	0.0652667	5.1525	0.791191	407.576	20.3503	409.345	21.9426	419.313	88.9583	407.576	20.3503	97.2008
09BLC1-85 <>	297.553	73097.1	2.0345	18.1061	1.97227	0.503988	2.11397	0.0661825	0.760955	0.359964	413.116	3.04501	414.398	7.19304	421.526	44.0452	413.116	3.04501	98.0048
09BLC1-55 <>	275.084	42670	2.29095	18.2701	2.60363	0.50665	2.93312	0.0671348	1.35065	0.460484	418.87	5.4776	416.194	10.0154	401.361	58.3309	418.87	5.4776	104.362
09BLC1-26 <>	82.4015	17164.6	0.942114	17.9314	11.4166	0.5166	13.6998	0.0671843	7.57265	0.552757	419.17	30.7325	422.878	47.4179	443.125	254.619	419.17	30.7325	94.5939
09BLC1-44 <>	354.947	56647.2	7.38803	17.9628	2.10625	0.558672	2.70469	0.0727832	1.69677	0.627345	452.902	7.42097	450.662	9.8438	439.229	46.8753	452.902	7.42097	103.113
09BLC1-5 <>	485.532	4671.95	2.59006	17.3012	3.76171	0.59163	4.50876	0.0742379	2.48566	0.551296	461.637	11.0735	471.908	17.0191	522.145	82.5504	461.637	11.0735	88.4117
09BLC1-16 <>	122.333	17851.9	2.05689	17.5665	5.57032	0.594221	5.70964	0.075706	1.25363	0.219564	470.441	5.68754	473.559	21.6124	488.674	122.988	470.441	5.68754	96.269
09BLC1-10 <>	150.248	11856	1.1359	17.1084	4.24843	0.6115	4.40546	0.0758759	1.16574	0.264612	471.459	5.29983	484.505	16.9757	546.682	92.8656	471.459	5.29983	86.2402
09BLC1-65 <>	32.3178	4848.33	1.05509	20.0465	12.1488	0.530128	12.6235	0.0770758	3.42922	0.271655	478.645	15.8193	431.894	44.4363	189.568	283.562	478.645	15.8193	252.492
09BLC1-73 <>	87.7654	12595.2	1.4859	18.866	8.81759	0.56722	8.91842	0.0776122	1.33729	0.149947	481.855	6.20886	456.215	32.7861	329.008	200.411	481.855	6.20886	146.457
09BLC1-92 <>	278.053	58155.8	1.89718	17.7513	2.78476	0.603245	2.92208	0.0776645	0.885233	0.302947	482.167	4.11259	479.291	11.1643	465.57	61.7197	482.167	4.11259	103.565
09BLC1-91 <>	162.118	43170.6	3.50128	17.6069	2.45492	0.610138	2.65583	0.0779129	1.01331	0.381542	483.653	4.72157	483.647	10.219	483.642	54.224	483.653	4.72157	100.002
09BLC1-98 <>	151.056	34238.4	1.86999	17.6702	3.28417	0.622711	3.81161	0.0798045	1.93457	0.507547	494.956	9.2169	491.545	14.853	475.707	72.6629	494.956	9.2169	104.046
09BLC1-78 <>	249.502	41986.7	1.18547	17.7011	3.68496	0.621989	4.54732	0.0798514	2.66444	0.585936	495.236	12.7012	491.093	17.7078	471.83	81.5758	495.236	12.7012	104.961
09BLC1-66 <>	165.852	36029	2.61215	17.4677	3.26825	0.635446	3.47682	0.0805034	1.1861	0.341145	499.127	5.69676	499.483	13.7177	501.135	71.9855	499.127	5.69676	99.5992
09BLC1-70 <>	163.048	29964.1	1.77504	17.2412	3.99564	0.673728	4.30971	0.0842463	1.61506	0.374749	521.419	8.08965	522.977	17.6166	529.807	87.5731	521.419	8.08965	98.4167
09BLC1-11 <>	203.061	58036.7	1.04544	17.2644	2.22785	0.67367	2.35785	0.0843524	0.772098	0.327459	522.05	3.87185	522.941	9.63688	526.858	48.8401	522.05	3.87185	99.0875
09BLC1-38 <>	140.983	66641.9	6.24068	17.5524	3.38497	0.669557	3.73995	0.085236	1.59033	0.425229	527.3	8.05204	520.443	15.2305	490.477	74.7024	527.3	8.05204	107.508
09BLC1-9 <>	82.5421	25873.4	1.52764	18.0906	7.5801	0.649709	7.84817	0.0852453	2.03367	0.259126	527.356	10.2977	508.3	31.3941	423.439	169.339	527.356	10.2977	124.541
09BLC1-89 <>	72.8457	17545.2	1.26428	17.5835	9.0049	0.670982	9.15266	0.0855687	1.63797	0.178961	529.276	8.32305	521.309	37.3347	486.563	199.104	529.276	8.32305	108.778
09BLC1-43 <>	60.4788	20237	0.766273	18.7621	11.1612	0.632886	11.3083	0.0861203	1.81783	0.160753	532.551	9.29182	497.892	44.5322	341.533	253.349	532.551	9.29182	155.93
09BLC1-29 <>	108.878	32434.3	1.8019	16.9036	5.07148	0.703891	5.66898	0.0862947	2.53325	0.446862	533.586	12.9728	541.112	23.7836	572.928	110.376	533.586	12.9728	93.1331
09BLC1-36 <>	117.98	119594	1.75727	17.353	2.33504	0.695907	3.04614	0.087584	1.95616	0.642177	541.233	10.1551	536.343	12.6926	515.582	51.2989	541.233	10.1551	104.975
09BLC1-51 <>	176.971	61658.4	1.78357	16.9915	2.06808	0.71556	2.7442	0.0881812	1.8038	0.657314	544.772	9.42284	548.042	11.6226	561.641	45.0704	544.772	9.42284	96.9965
09BLC1-20 <>	156.101	47745.5	2.3804	17.3867	3.75173	0.699373	4.11652	0.0881913	1.69419	0.411558	544.831	8.85117	538.417	17.2037	511.361	82.4958	544.831	8.85117	106.545
09BLC1-74 <>	159.51	66020	4.65912	17.2666	2.77783	0.710646	2.93798	0.0889937	0.956766	0.325655	549.583	5.04032	545.13	12.3935	526.575	60.9079	549.583	5.04032	104.369
09BLC1-58 <>	126.934	25489.8	1.40495	17.4019	4.0576	0.707961	4.57727	0.0893519	2.11833	0.462793	551.703	11.2008	543.535	19.2673	509.413	89.2533	551.703	11.2008	108.302
09BLC1-32 <>	50.5532	15433.1	1.47918	18.0055	12.4183	0.69383	12.6126	0.0906059	2.20529	0.174848	559.119	11.8106	535.099	52.5054	433.951	277.552	559.119	11.8106	128.844
09BLC1-19 <>	70.4768	14602.4	1.87541	17.7262	5.63491	0.713305	5.8743	0.0917043	1.65986	0.282564	565.608	8.98825	546.707	24.8378	468.684	124.845	565.608	8.98825	120.68
09BLC1-22 <>	372.016	138875	2.09952	16.8833	1.0717	0.759975	1.45964	0.0930583	0.990962	0.678908	573.599	5.4386	573.996	6.39993	575.562	23.2909	573.599	5.4386	99.6589
09BLC1-94 <>	210.082	36387.7	1.44205	16.7456	1.656	0.766588	3.22369	0.0931025	2.76583	0.857971	573.86	15.1861	577.804	14.2049	593.364	35.8837	573.86	15.1861	96.7129
09BLC1-8 <>	430.946	236994	2.73571	16.308	1.80059	0.78886	4.00464	0.0933035	3.57702	0.893217	575.045	19.6788	590.525	17.9334	650.488	38.6672	575.045	19.6788	88.4021
09BLC1-77 <>	82.7557	20283.7	3.47005	16.8353	4.51693	0.765121	9.22823	0.0934221	8.04721	0.872021	575.744	44.3233	576.96	40.6383	581.761	98.1206	575.744	44.3233	98.9657
09BLC1-68 <>	169.082	43568.6	1.45286	16.5918	1.64867	0.780253	3.21648	0.0938918	2.76182	0.858646	578.513	15.2816	585.628	14.3151	613.289	35.6079	578.513	15.2816	94.3295
09BLC1-64 <>	202.433	58164.4	4.50531	16.8714	2.25517	0.775445	2.37309	0.094886	0.738746	0.311301	584.369	4.12711	582.882	10.5245	577.113	48.9997	584.369	4.12711	101.257
09BLC1-54 <>	21.7191	6696.4	4.75973	18.0691	13.4296	0.728485	14.2385	0.0954674	4.73064	0.332244	587.791	26.5764	555.663	61.0057	426.091	300.733	587.791	26.5764	137.95
09BLC1-81 <>	455.964	7036.13	6.44498	16.2225	3.06028	0.818405	5.13887	0.0962907	4.12828	0.803344	592.634	23.3748	607.158	23.4884	661.719	65.6142	592.634	23.3748	89.5599
09BLC1-79 <>	365.95	7787.31	2.01087	16.1905	1.0357	0.861867	1.60311	0.101204	1.22364	0.763291	621.463	7.24942	631.141	7.53517	665.975	22.166	621.463	7.24942	93.3164
09BLC1-90 <>	162.392	69877.7	2.90842	16.5579	3.31509	0.848455	3.48534	0.10189	1.07599	0.308718	625.478	6.41388	623.801	16.2455	617.701	71.6001	625.478	6.41388	101.259
09BLC1-97 <>	221.562	57525.6	3.95337	15.9745	1.56648	0.88559	2.15145	0.102603	1.47475	0.685467	629.643	8.84659	643.997	10.2603	694.646	33.4009	629.643	8.84659	90.6422
09BLC1-57 <>	480.99	123520	48.4638	16.2789	0.93288	0.903844	4.39248	0.106713	4.29227	0.977187	653.631	26.6803	653.78	21.177	654.311	20.0011	653.631	26.6803	99.8961
09BLC1-59 <>	220.123	82155.5	3.80615	15.1188	2.94925	1.04891	6.2149	0.115015	5.47055	0.880231	701.807	36.377	728.341	32.3166	810.911	61.6998	701.807	36.377	86.5455
09BLC1-13 <>	227.416	153436	5.18528	15.5961	1.39772	1.03557	5.34967	0.117137	5.16385	0.965265	714.062	34.9046	721.709	27.6412	745.526	29.5452	714.062	34.9046	95.7797
09BLC1-45 <>	102.365	23224	1.11952	15.7291	3.43534	1.04739	3.58097	0.119484	1.01086	0.282285	727.594	6.95504	727.587	18.6032	727.547	72.8258	727.594	6.95504	100.006
09BLC1-26 <>	548.97	17023.2	1.80821	15.3344	0.764876	1.13733	1.71524	0.126488	1.53526	0.895068	767.8	11.1128	771.24	9.26789	781.198	16.0747	767.8	11.1128	98.2848
09BLC1-42 <>	45.9648	23725.8	4.63693	13.9654	2.73567	1.64015	3.54328	0.166125	2.25188	0.635535	990.727	20.6802	985.769	22.3542	974.749	55.7623	974.749	55.7623	101.639
09BLC1-37 <>	118.904	53361.5	2.40107	13.7406	1.58682	1.65782	2.62398	0.165211	2.0898	0.796425	985.673	19.1011	992.542	16.6203	1007.74	32.19	1007.74	32.19	97.8105
09BLC1-87 <>	369.285	10459.9	1.64888	13.4752	0.964916	1.76968	1.48608	0.172953	1.13021	0.760531	1028.36	10.743	1034.4	9.64165	1047.22	19.4753	1047.22	19.4753	98.1998
09BLC1-4 <>	323.351	93625.2	1.17231	13.4305	0.250736	1.83709	2.09806	0.178946	2.08302	0.992833	1061.21	20.3818	1058.82	13.7953	1053.91	5.04967	1053.91	5.04967	100.693
09BLC1-95 <>	206.391	33082.8	2.431	13.1861	2.13529	1.82871	7.27288	0.174887	6.95236	0.955929	1038.98	66.7156	1055.82	47.7763	1090.77	42.7619	1090.77	42.7619	95.2521
09BLC1-21 <>	230.823	377967	2.3289	13.1344	1.14471	1.96825	1.75057	0.187496	1.32444	0.756576	1107.79	13.4806	1104.71	11.7872	1098.66	22.9052	1098.66	22.9052	100.831
09BLC1-30 <>	110.782	107136	1.47021	13.1206	1.41022	1.89318	3.02273	0.180154	2.67361	0.884501	1067.81	26.3101	1078.7	20.0864	1100.74	28.2002	1100.74	28.2002	97.009
09BLC1-31 <>	158.238	12974.8	2.53419	13.0526	1.58082	1.92017	1.97844	0.181776	1.18964	0.6013	1076.67	11.796	1088.13	13.2102	1111.12	31.5746	1111.12	31.5746	96.8996
09BLC1-56 <>	281.149	179213	5.031	13.042	0.947729	2.0408	2.30252	0.193038	2.09843	0.911362	1137.81	21.8878	1129.23	15.692	1112.74	18.9196	1112.74	18.9196	102.253
09BLC1-63 <>	100.64	103702	1.58656	12.8776	1.92826	2.02813	3.77901	0.189422	3.25004	0.860024	1118.25	33.3662	1124.99	25.7053	1138.05	38.3704	1138.05	38.3704	98.2595
09BLC1-47 <>	422.561	30084.7	1.57411	9.70569	0.263233	4.08139	1.32547	0.287299	1.29907	0.980082	1628.02	18.6899	1650.59	10.8104	1679.43	4.86223	1679.43	4.86223	96.9383
09BLC1-80 <>	81.3191	141751	0.901395	9.23942	1.15044	4.71118	1.81647	0.315699	1.40571	0.773873	1768.69	21.7437	1769.23	15.2158	1769.85	21.0092	1769.85	21.0092	99.9345
09BLC1-61 <>	84.3843	54777.5	1.66637	5.26822	0.585829	12.6373	3.84868	0.482856	3.80383	0.988347	2539.69	79.851	2653	36.2286	2740.56	9.63436	2740.56	9.63436	92.6704
13ZA91-10 <>	425.666	69711	1.1003	19.416	3.09531	0.301136	3.6653	0.0424054	1.96303	0.535571	267.726	5.14788	267.287	8.61369	263.428	71.0628	267.726	5.14788	NA
13ZA91-14 <>	304.594	53609.7	1.29757	18.7255	2.73154	0.312656	3.01794	0.0424618	1.2832	0.425192	268.074	3.36939	276.237	7.299	345.969	61.7782	268.074	3.36939	NA
13ZA91-68 <>	234.735	8786.36	1.44746	19.2505	2.64083	0.305757	3.24284	0.0426891	1.88202	0.580362	269.48	4.96712	270.887	7.7104	283.085	60.4133	269.48	4.96712	NA
13ZA91-51 <>	207.027	20686.8	1.23092	19.3587	7.5279	0.305598	7.63793	0.0429066	1.29177	0.169126	270.824	3.42596	270.763	18.1548	270.211	172.806	270.824	3.42596	NA
13ZA91-48 <>	516.091	33640.2	1.17436	19.1306	2.54729	0.309397	3.77317	0.0429283	2.78355	0.737722	270.959	7.38596	273.713	9.053	297.334	58.139	270.959	7.38596	NA
13ZA91-87 <>	150.568	23953.8	1.07789	18.9919	7.81959	0.312131	8.19113	0.0429936	2.43898	0.297759	271.362	6.48109	275.832	19.7874	313.908	178.123	271.362	6.48109	NA
13ZA91-66 <>	349.401	40482.7	1.14012	19.5823	3.46881	0.303894	3.8671	0.0431604	1.70934	0.44202	272.393	4.55911	269.437	9.15181	243.828	79.9544	272.393	4.55911	NA
13ZA91-89 <>	300.906	20744.7	0.928746	18.8823	5.67075	0.316341	6.08958	0.0433221	2.21936	0.364453	273.392	5.9407	279.084	14.8606	327.052	128.776	273.392	5.9407	NA
13ZA91-97 <>	260.251	9414.11	0.940173	19.4141	3.60805	0.307701	4.28107	0.0433256	2.30425	0.538242	273.413	6.1684	272.397	10.2286	263.671	82.8561	273.413	6.1684	NA
13ZA91-80 <>	211.476	19390.4	1.03656	18.7348	5.09701	0.319199	5.22813	0.043372	1.16351	0.222549	273.7	3.11788	281.286	12.8455	344.827	115.386	273.7	3.11788	NA
13ZA91-92 <>	452.932	147542	0.853937	18.8676	2.177	0.317272	3.32113	0.0434158	2.50811	0.755196	273.971	6.72752	279.802	8.12236	328.837	49.3775	273.971	6.72752	NA
13ZA91-34 <>	524.534	15437	1.4365	18.6139	1.73281	0.321608	2.43475	0.0434174	1.71037	0.702482	273.981	4.58789	283.139	6.01609	359.446	39.0842	273.981	4.58789	NA
13ZA91-86 <>	212.505	13353.3	1.1825	19.0584	3.64361	0.314319	4.14005	0.0434465	1.96575	0.474812	274.161	5.27632	277.523	10.0535	305.946	83.0333	274.161	5.27632	NA
13ZA91-41 <>	161.041	4040.08	1.60137	20.5164	11.5306	0.292232	11.6662	0.043484	1.77319	0.151994	274.392	4.7634	260.315	26.7945	135.432	271.719	274.392	4.7634	NA
13ZA91-58 <>	99.854	11825.8	1.03845	18.6552	9.56018	0.32171	9.8515	0.0435274	2.37804	0.241389	274.661	6.39435	283.217	24.3525	354.482	216.386	274.661	6.39435	NA
13ZA91-61 <>	279.085	72908	1.91427	18.886	1.80587	0.317859	2.01554	0.0435386	0.895102	0.444101	274.73	2.40745	280.254	4.93616	326.641	40.9743	274.73	2.40745	NA
13ZA91-100 <>	327.659	41796.3	0.928997	19.6258	1.87441	0.306361	2.41122	0.0436073	1.51676	0.629042	275.154	4.08561	271.357	5.74172	238.719	43.2264	275.154	4.08561	NA
13ZA91-70 <>	136.734	1802.91	0.94962	19.65	7.89848	0.306689	8.1875	0.0437079	2.15618	0.26335	275.775	5.82082	271.611	19.5146	235.895	182.475	275.775	5.82082	NA
13ZA91-71 <>	298.389	26824.9	1.13029	19.4473	6.45479	0.310502	6.65153	0.0437948	1.60581	0.241419	276.312	4.34329	274.57	16.0035	259.725	148.399	276.312	4.34329	NA
13ZA91-96 <>	216.175	28446.2	0.676067	19.967	4.52588	0.303598	5.97089	0.0439653	3.89461	0.652266	277.365	10.5732	269.206	14.1205	198.828	105.168	277.365	10.5732	NA
13ZA91-67 <>	65.0659	9722.52	0.893789	19.5145	15.9098	0.312015	16.6047	0.0441602	4.75324	0.286259	278.568	12.959	275.741	40.1166	251.842	368.031	278.568	12.959	NA
13ZA91-50 <>	167.51	2912.88	1.25774	17.6733	9.4986	0.34704	9.61062	0.0444832	1.46306	0.152234	280.562	4.01675	302.492	25.146	475.305	210.503	280.562	4.01675	NA
13ZA91-81 <>	135.563	38044.9	1.10783	19.9199	10.6981	0.308622	11.3494	0.0445875	3.78948	0.333892	281.206	10.4272	273.113	27.1844	204.292	248.833	281.206	10.4272	NA
13ZA91-47 <>	245.286	18662.3	1.05093	19.3917	4.0307	0.317145	4.37247	0.0446038	1.69468	0.38758	281.306	4.66473	279.704	10.6905	266.313	92.516	281.306	4.66473	NA
13ZA91-15 <>	521.607	77227.7	0.890664	19.3842	2.64353	0.317522	4.18829	0.0446397	3.24861	0.775642	281.528	8.94893	279.995	10.2494	267.206	60.6755	281.528	8.94893	NA
13ZA91-90 <>	191.958	13444.3	0.965341	18.2505	10.8936	0.34336	11.1202	0.045449	2.23344	0.200845	286.52	6.25912	299.715	28.868	403.761	244.575	286.52	6.25912	NA
13ZA91-22 <>	94.7404	16409.6	1.27872	18.1645	12.4031	0.351611	12.7174	0.0463217	2.80997	0.220955	291.899	8.01936	305.932	33.6045	414.333	278.153	291.899	8.01936	NA
13ZA91-32 <>	132.914	25484	1.13498	19.2216	8.60241	0.334914	8.77729	0.0466898	1.74337	0.198623	294.167	5.01317	293.311	22.3635	286.493	196.976	294.167	5.01317	NA
13ZA91-43 <>	237.606	21838.8	1.4007	19.2882	5.12467	0.335708	6.28352	0.0469627	3.63598	0.578653	295.847	10.5138	293.914	16.0368	278.603	117.392	295.847	10.5138	NA
13ZA91-91 <>	316.165	79760.4	2.02391	18.8424	3.3422	0.354028	4.25305	0.0483808	2.63023	0.618435	304.573	7.82468	307.746	11.2917	331.842	75.7989	304.573	7.82468	NA
13ZA91-64 <>	129.399	9853.38	0.57867	19.5454	5.28405	0.34778	5.99594	0.0493001	2.83375	0.472612	310.223	8.58278	303.05	15.7111	248.181	121.69	310.223	8.58278	NA
13ZA91-69 <>	177.751	14440.3	1.29042	18.1866	6.0513	0.376425	6.36281	0.0496511	1.96649	0.309059	312.379	5.99644	324.404	17.6705	411.609	135.408	312.379	5.99644	NA
13ZA91-4 <>	274.92	39484.9	1.11776	18.8342	3.17125	0.368946	3.8682	0.0503974	2.21498	0.572613	316.961	6.85084	318.872	10.586	332.833	71.9029	316.961	6.85084	NA
13ZA91-6 <>	179.43	44721.7	1.82502	16.0984	2.62662	0.525184	3.85027	0.0613188	2.81521	0.731174	383.641	10.4852	428.609	13.4628	678.151	56.1631	383.641	10.4852	NA
13ZA91-94 <>	382.212	6627.83	2.02255	17.8764	3.63772	0.475621	4.44617	0.0616651	2.55645	0.574978	385.744	9.5721	395.064	14.5523	449.955	80.8447	385.744	9.5721	NA
13ZA91-5 <>	302.373	61256.1	12.8946	17.6796	1.69922	0.508646	2.04551	0.065221	1.13874	0.556706	407.299	4.49461	417.538	7.0027	474.509	37.6016	407.299	4.49461	85.836
13ZA91-18 <>	114.839	16113.1	2.0301	17.7014	4.10801	0.511475	4.43461	0.0656647	1.67035	0.376662	409.984	6.63495	419.441	15.2385	471.759	90.9372	409.984	6.63495	86.9053
13ZA91-24 <>	317.215	3367.88	3.35601	17.4314	6.4432	0.530978	6.6246	0.0671284	1.53962	0.23241	418.832	6.24342	432.458	23.3331	505.724	141.891	418.832	6.24342	82.8183
13ZA91-74 <>	350.157	62561.4	8.15925	17.8182	1.45881	0.549316	5.70594	0.0709881	5.51631	0.966766	442.106	23.5705	444.549	20.5446	457.19	32.372	442.106	23.5705	96.7005
13ZA91-35 <>	145.123	33025.8	1.28272	17.367	3.09526	0.592131	3.93368	0.074583	2.42759	0.617129	463.708	10.8616	472.227	14.8559	513.821	68.0338	463.708	10.8616	90.247
13ZA91-13 <>	330.548	46197.2	1.81214	17.7162	1.69617	0.590823	2.48907	0.0759147	1.82167	0.731868	471.692	8.28582	471.393	9.38673	469.919	37.5682	471.692	8.28582	100.377
13ZA91-8 <>	204.325	43028.9	1.37466	17.865	4.12586	0.586405	4.42261	0.07598	1.59271	0.360129	472.083	7.25021	468.569	16.6009	451.37	91.6662	472.083	7.25021	104.589
13ZA91-20 <>	661.091	119378	15.1489	17.3417	1.26999	0.607683	2.15815	0.0764305	1.74492	0.808525	474.782	7.98683	482.098	8.28319	517.018	27.8918	474.782	7.98683	91.8307
13ZA91-59 <>	175.703	18509.9	0.666934	17.6932	5.01792	0.600735	5.09674	0.0770881	0.892901	0.17519	478.719	4.11963	477.7	19.424	472.823	111.101	478.719	4.11963	101.247
13ZA91-75 <>	295.146	48443.9	1.51182	17.7488	1.61698	0.599711	2.08231	0.0771986	1.31201	0.630076	479.38	6.06135	477.051	7.92655	465.872	35.8305	479.38	6.06135	102.9
13ZA91-42 <>	239.997	45390.5	1.8281	17.9678	3.24365	0.594317	3.48322	0.0774483	1.26948	0.364454	480.874	5.88245	473.621	13.185	438.614	72.227	480.874	5.88245	109.635
13ZA91-83 <>	83.5323	12025.9	1.23442	17.4933	9.76086	0.610728	10.0376	0.0774851	2.34071	0.233194	481.094	10.8511	484.019	38.6629	497.87	215.481	481.094	10.8511	96.6304
13ZA91-16 <>	140.273	32778.4	2.44634	17.2591	4.27158	0.620759	4.81272	0.0777034	2.21717	0.46069	482.4	10.3052	490.323	18.7186	527.53	93.6614	482.4	10.3052	91.4451
13ZA91-49 <>	304.626	9937.35	3.0633	17.4263	3.08092	0.619266	5.37083	0.0782672	4.39929	0.819108	485.772	20.5852	489.387	20.8589	506.334	67.7956	485.772	20.5852	95.939
13ZA91-76 <>	148.044	13014.2	1.43544	17.5181	1.82729	0.618795	2.53169	0.07862	1.75228	0.692137	487.88	8.23352	489.092	9.82673	494.749	40.2711	487.88	8.23352	98.6118
13ZA91-39 <>	201.467	10864.2	1.64704	17.8453	4.42136	0.609414	4.55452	0.0788741	1.09328	0.240043	489.399	5.15246	483.191	17.513	453.866	98.1946	489.399	5.15246	107.829
13ZA91-63 <>	111.5	10570.6	2.82954	17.6214	5.95611	0.618073	8.65976	0.0789912	6.28619	0.725908	490.098	29.6667	488.639	33.5998	481.822	131.675	490.098	29.6667	101.718
13ZA91-30 <>	164.442	23624.3	1.57592	17.0485	4.32306	0.653917	5.80135	0.0808551	3.8687	0.666862	501.225	18.6563	510.886	23.294	554.342	94.3813	501.225	18.6563	90.418
13ZA91-73 <>	131.507	27844.3	1.73165	17.4573	5.40821	0.659228	6.55895	0.0834663	3.71093	0.565782	516.779	18.4288	514.142	26.4662	502.45	119.123	516.779	18.4288	102.852
13ZA91-56 <>	196.654	3126.92	1.83031	16.7339	2.69817	0.72026	3.03056	0.0874151	1.37992	0.455335	540.231	7.15095	550.82	12.8846	594.855	58.4891	540.231	7.15095	90.8174
13ZA91-31 <>	62.384	18605	1.94344	16.6751	9.74146	0.730787	9.8356	0.0883806	1.35758	0.138027	545.952	7.10658	557.015	42.1918	602.464	211.297	545.952	7.10658	90.6198
13ZA91-85 <>	262.512	50943	0.888335	17.3337	1.95921	0.705012	2.71463	0.0886312	1.87902	0.692183	547.437	9.86178	541.78	11.398	518.028	43.0104	547.437	9.86178	105.677
13ZA91-25 <>	211.149	9882.63	0.735571	16.4331	3.3414	0.747545	5.71189	0.0890954	4.63257	0.811041	550.185	24.4305	566.799	24.8145	634.057	71.9722	550.185	24.4305	86.7721
13ZA91-6 <>	558.25	166380	4.13431	16.937	0.843841	0.725604	1.78256	0.0891323	1.57017	0.880854	550.403	8.28363	553.97	7.61098	568.677	18.3723	550.403	8.28363	96.7866
13ZA91-72 <>	339.558	2778.42	2.61038	16.7793	4.03982	0.737876	4.22245	0.0897958	1.2284	0.290922	554.329	6.52484	561.166	18.2056	588.962	87.6549	554.329	6.52484	94.1197
13ZA91-12 <>	250.19	66116.2	1.86707	17.0486	2.01111	0.729718	2.13434	0.0902281	0.71471	0.334863	556.886	3.81305	556.387	9.1429	554.336	43.8693	556.886	3.81305	100.46
13ZA91-79 <>	170.305	33851.7	1.63112	17.1514	3.1591	0.736477	3.27154	0.0916134	0.850327	0.259917	565.072	4.60039	560.348	14.0896	541.207	69.0772	565.072	4.60039	104.41
13ZA91-60 <>	126.069	28477.8	1.3847	17.2876	1.60161	0.744892	3.23019	0.0933954	2.80517	0.868422	575.587	15.4464	565.256	14.0027	523.878	35.1362	575.587	15.4464	109.87
13ZA91-77 <>	350.096	93477.6	10.3605	15.6094	4.15935	0.838541	7.3114	0.0949315	6.01302	0.822417	584.637	33.6077	618.34	33.8721	743.716	87.972	584.637	33.6077	78.6102
13ZA91-78 <>	136.673	51763.2	3.02945	16.6195	4.31611	0.796282	4.68133	0.0959808	1.81275	0.38723	590.812	10.2338	594.729	21.0743	609.679	93.3559	590.812	10.2338	96.9055
13ZA91-21 <>	365.787	153879	2.76827	16.3493	0.912368	0.882962	1.41907	0.104698	1.0869	0.765922	641.883	6.64052	642.581	6.7568	645.056	19.6263	641.883	6.64052	99.5081
13ZA91-99 <>	194.718	20095.2	1.79544	16.4052	2.10241	0.880178	6.03552	0.104725	5.6575	0.937368	642.04	34.5735	641.079	28.6967	637.712	45.2585	642.04	34.5735	100.679
13ZA91-23 <>	208.978	91665.9	1.44377	15.5634	1.70614	0.932505	3.39143	0.105258	2.93102	0.864243	645.149	17.9941	668.951	16.6181	749.958	36.0298	645.149	17.9941	86.0246
13ZA91-3 <>	112.617	35040.6	1.68459	15.444	2.73707	0.971745	6.65292	0.108846	6.06381	0.911451	666.042	38.3716	689.363	33.3042	766.201	57.6835	666.042	38.3716	86.9278
13ZA91-62 <>	142.682	98091.5	1.69853	15.9174	1.10641	0.947294	5.29263	0.109359	5.17569	0.977906	669.026	32.8908	676.693	26.1487	702.309	23.5527	669.026	32.8908	95.2609
13ZA91-9 <>	335.766	38936.5	1.66618	15.9726	1.12637	0.944989	1.71767	0.109472	1.2968	0.754977	669.679	8.24856	675.49	8.47403	694.911	24.0068	669.679	8.24856	96.369
13ZA91-57 <>	285.348	5737.32	5.04648	14.6235	4.22717	1.1376	5.17748	0.120653	2.98954	0.577412	734.321	20.7487	771.368	27.9847	880.167	87.4895	734.321	20.7487	83.4298
13ZA91-28 <>	242.402	53911.4	2.37182	15.3191	1.24688	1.15922	3.6302	0.128795	3.40934	0.939162	780.988	25.077	781.589	19.7918	783.286	26.1968	780.988	25.077	99.7067
13ZA91-37 <>	143.862	49477.9	1.77819	14.5915	3.34033	1.24516	4.95898	0.131773	3.6652	0.739103	797.971	27.5096	821.219	27.9325	884.711	69.0555	797.971	27.5096	90.1956
13ZA91-55 <>	188.155	151023	4.43915	14.4597	1.55604	1.29741	4.68494	0.136062	4.41898	0.943231	822.354	34.1176	844.579	26.8704	903.429	32.0866	822.354	34.1176	91.0259
13ZA91-36 <>	103.761	37223	1.14227	14.5773	2.45634	1.38358	3.05746	0.146279	1.82057	0.595452	880.069	14.9768	881.966	18.0223	886.708	50.759	880.069	14.9768	99.2513
13ZA91-93 <>	135.158	18375	1.87655	13.6218	2.78643	1.73619	4.65842	0.171526	3.73319	0.801385	1020.51	35.2355	1022.05	30.0225	1025.33	56.3933	1025.33	56.3933	99.5307
13ZA91-45 <>	139.922	83918.1	1.91834	13.6168	1.50691	1.41239	2.81522	0.139486	2.37796	0.844679	841.754	18.7648	894.166	16.7374	1026.06	30.4828	1026.06	30.4828	82.0373
13ZA91-82 <>	136.781	86216.2	1.86398	13.5088	1.33823	1.81148	1.94441	0.17748	1.41062	0.725476	1053.19	13.7065	1049.61	12.7215	1042.15	27.0239	1042.15	27.0239	101.059
13ZA91-52 <>	134.642	7034.47	0.704221	13.2883	1.50095	1.83908	2.40424	0.177244	1.87817	0.781189	1051.9	18.2288	1059.53	15.8149	1075.31	30.1394	1075.31	30.1394	97.823
13ZA91-33 <>	129.902	133472	3.12963	13.2602	1.51247	1.91283	3.88518	0.183961	3.5787	0.921115	1088.58	35.8457	1085.57	25.9118	1079.54	30.3318	1079.54	30.3318	100.837
13ZA91-53 <>	291.402	100068	4.09802	13.2286	0.792243	1.88301	1.90393	0.180661	1.73127	0.909315	1070.59	17.0775	1075.12	12.6273	1084.36	15.8772	1084.36	15.8772	98.7298
13ZA91-7 <>	174.317	108331	2.35335	13.133	1.68445	1.92746	4.54673	0.18359	4.2232	0.928842	1086.56	42.2292	1090.66	30.4056	1098.86	33.6929	1098.86	33.6929	98.8805
13ZA91-38 <>	34.9462	24183.7	1.04953	13.1046	5.92905	1.98817	6.25817	0.188963	2.00275	0.320021	1115.76	20.5189	1111.5	42.3035	1103.18	118.642	1103.18	118.642	101.14
13ZA91-98 <>	145.491	24031.4	1.66554	12.8286	1.23836	2.04868	2.54949	0.190612	2.22853	0.87411	1124.69	22.9996	1131.86	17.3975	1145.64	24.5891	1145.64	24.5891	98.1711
13ZA91-19 <>	157.699	124408	2.10223	12.6686	2.29805	1.96388	6.07113	0.180444	5.61939	0.925593	1069.4	55.3753	1103.21	40.8685	1170.49	45.5079	1170.49	45.5079	91.3635
13ZA91-1 <>	84.9209	31444.9	1.42059	12.5084	1.51279	2.25613	2.02991	0.204675	1.35352	0.666788	1200.39	14.8244	1198.7	14.2823	1195.64	29.8426	1195.64	29.8426	100.397
13ZA91-54 <>	130.13	21515.2	1.27386	12.4026	0.74075	2.32914	2.0016	0.209511	1.85949	0.929	1226.21	20.764	1221.21	14.22	1212.4	14.5583	1212.4	14.5583	101.139
13ZA91-44 <>	162.623	6128.78	1.33448	11.9275	3.79811	2.41279	5.76756	0.208722	4.3404	0.752554	1222	48.3167	1246.41	41.426	1288.82	73.9348	1288.82	73.9348	94.8154
12ZA93-2 <>	396.581	134529	2.08381	14.152	0.843524	1.43285	2.1539	0.147068	1.98186	0.920124	884.504	16.3802	902.738	12.8814	947.608	17.2793	947.608	17.2793	93.3407
12ZA93-6 <>	129.484	61639.1	2.57112	14.0184	1.79914	1.51326	3.10694	0.153854	2.53302	0.815277	922.533	21.7729	935.757	18.9972	967.035	36.7245	967.035	36.7245	95.398
12ZA93-7 <>	344.734	4770.86	0.814461	19.1846	2.84836	0.30231	2.9414	0.0420634	0.733928	0.249517	265.61	1.90977	268.203	6.93313	290.884	65.068	265.61	1.90977	NA
12ZA93-8 <>	156.404	22364.8	0.941033	19.1263	5.23154	0.304576	5.79589	0.0422498	2.49466	0.430419	266.763	6.51903	269.968	13.7405	297.848	119.43	266.763	6.51903	NA
12ZA93-9 <>	270.951	91207.7	1.37848	17.3259	2.00871	0.596063	3.5424	0.0749008	2.91782	0.823685	465.614	13.1068	474.732	13.4337	519.017	44.0781	465.614	13.1068	89.7108
12ZA93-10 <>	150.894	104672	2.60789	13.6665	1.0379	1.7113	3.56164	0.169622	3.40706	0.956598	1010.03	31.8521	1012.77	22.8298	1018.69	21.0195	1018.69	21.0195	99.1499
12ZA93-11 <>	363.665	181662	1.56411	16.0938	1.40611	0.873674	3.68092	0.101978	3.40177	0.924162	625.99	20.2935	637.56	17.4295	678.768	30.0444	625.99	20.2935	92.2244
12ZA93-12 <>	261.094	59577	1.84585	17.5024	2.09215	0.609099	2.65725	0.0773184	1.63825	0.616522	480.097	7.57947	482.991	10.2137	496.744	46.123	480.097	7.57947	96.6488
12ZA93-13 <>	166.314	69584.5	2.68261	13.9896	1.7627	1.57019	3.91995	0.159315	3.50127	0.893193	952.969	31.0172	958.5	24.3209	971.224	35.9469	971.224	35.9469	98.1204
12ZA93-15 <>	330.854	87121.2	4.10238	16.8765	1.30823	0.734601	2.05705	0.0899149	1.58745	0.77171	555.034	8.44222	559.25	8.84582	576.426	28.4171	555.034	8.44222	96.2889
12ZA93-17 <>	576.553	146639	8.99719	16.256	0.536305	0.903462	2.44714	0.106518	2.38765	0.97569	652.492	14.8167	653.576	11.7943	657.343	11.4874	652.492	14.8167	99.2619
12ZA93-18 <>	140.046	23750.3	2.28202	18.0045	2.42665	0.5846	2.58928	0.0763376	0.903181	0.348816	474.225	4.12936	467.414	9.69976	434.075	54.0693	474.225	4.12936	109.25
12ZA93-19 <>	480.409	2119.35	0.666403	18.7581	5.61126	0.329471	6.0602	0.0448233	2.28907	0.377722	282.661	6.33051	289.162	15.2506	342.036	127.106	282.661	6.33051	NA
12ZA93-20 <>	296.683	75182.8	1.47619	17.4005	2.13259	0.56814	2.34255	0.0716995	0.969336	0.413795	446.387	4.18057	456.811	8.61788	509.597	46.8766	446.387	4.18057	87.5959
12ZA93-21 <>	116.946	31865.5	0.805434	17.4053	6.98226	0.579555	7.73615	0.0731602	3.33108	0.430586	455.167	14.6391	464.175	28.8291	508.994	153.691	455.167	14.6391	89.4248
12ZA93-24 <>	352.375	10002.5	1.32383	19.0934	3.49484	0.315982	4.18601	0.0437565	2.30407	0.550422	276.076	6.22669	278.807	10.206	301.777	79.6904	276.076	6.22669	NA
12ZA93-25 <>	395.335	103108	0.901563	17.0796	1.51819	0.684738	2.88385	0.0848204	2.45187	0.850208	524.831	12.3583	529.634	11.9018	550.389	33.1477	524.831	12.3583	95.3564
12ZA93-26 <>	255.895	17033	0.766682	16.655	1.37301	0.785859	2.19163	0.0949268	1.70823	0.779435	584.609	9.54704	588.82	9.79281	605.064	29.7078	584.609	9.54704	96.6194
12ZA93-27 <>	183.777	114060	3.15157	14.2407	2.3067	1.2243	3.81023	0.12645	3.03265	0.795924	767.581	21.9457	811.742	21.298	934.815	47.3338	767.581	21.9457	82.1105
12ZA93-28 <>	62.8362	24694.5	2.94219	13.4824	1.99756	1.72182	2.48357	0.168366	1.47576	0.594208	1003.1	13.7091	1016.7	15.954	1046.14	40.3016	1046.14	40.3016	95.8863
12ZA93-29 <>	210.359	53894.7	2.30956	13.2552	0.624629	1.8957	3.12996	0.182245	3.067	0.979885	1079.23	30.4778	1079.58	20.8087	1080.31	12.5138	1080.31	12.5138	99.8996
12ZA93-30 <>	326.426	157024	3.54905	13.2104	0.703599	1.80879	1.0191	0.173303	0.737235	0.723417	1030.28	7.01971	1048.64	6.66381	1087.08	14.0836	1087.08	14.0836	94.775
12ZA93-31 <>	208.119	4134.45	0.667505	18.3266	9.97794	0.317773	10.1459	0.0422374	1.83848	0.181204	266.687	4.80295	280.188	24.8475	394.44	224.277	266.687	4.80295	NA
12ZA93-32 <>	571.352	13271.9	1.70471	17.0137	0.923277	0.707361	2.51474	0.0872846	2.33912	0.930164	539.458	12.105	543.178	10.5793	558.797	20.1307	539.458	12.105	96.5392
12ZA93-33 <>	273.028	5376.17	0.93469	17.1748	6.36511	0.610919	7.02821	0.0760981	2.9801	0.42402	472.791	13.5854	484.14	27.07	538.228	139.382	472.791	13.5854	87.8422
12ZA93-34 <>	304.005	238260	1.11735	16.0674	0.596065	0.98599	2.44186	0.114899	2.368	0.969749	701.139	15.7319	696.672	12.3103	682.267	12.7291	701.139	15.7319	102.766
12ZA93-35 <>	72.2961	40337.9	1.75947	16.7533	2.69034	0.823326	5.18737	0.100039	4.43518	0.854997	614.64	26.0013	609.902	23.7883	592.322	58.3158	614.64	26.0013	103.768
12ZA93-36 <>	75.4032	45191.1	2.6097	15.8907	2.90702	0.915382	7.78334	0.105498	7.22009	0.927633	646.549	44.4175	659.915	37.7871	705.84	61.8375	646.549	44.4175	91.6001
12ZA93-37 <>	197.543	66640.7	2.15887	13.7595	1.16238	1.70635	3.80074	0.170282	3.61863	0.952086	1013.67	33.9426	1010.92	24.3369	1004.94	23.5701	1004.94	23.5701	100.868
12ZA93-38 <>	77.7911	108380	1.30185	11.4947	1.5843	2.7629	2.57083	0.230336	2.02464	0.787544	1336.26	24.4347	1345.57	19.1689	1360.4	30.5309	1360.4	30.5309	98.2257
12ZA93-39 <>	141.005	61275.9	3.84712	12.7916	1.11241	2.08274	2.39823	0.193223	2.12463	0.885916	1138.81	22.179	1143.14	16.4535	1151.34	22.1041	1151.34	22.1041	98.9117
12ZA93-40 <>	140.207	209045	1.64544	5.36957	0.561619	13.8473	7.77916	0.539266	7.75886	0.997391	2780.38	175.272	2739.32	73.7979	2709.18	9.26634	2709.18	9.26634	102.628
12ZA93-41 <>	149.696	44217.1	2.81676	18.4725	2.60717	0.558024	3.43019	0.0747614	2.22909	0.649845	464.778	9.99567	450.239	12.4752	376.626	58.6658	464.778	9.99567	123.406
12ZA93-42 <>	128.139	1965.45	1.08468	17.7369	12.4376	0.333291	12.6371	0.0428746	2.23664	0.17699	270.627	5.92766	292.076	32.0864	467.366	276.368	270.627	5.92766	NA
12ZA93-43 <>	235.871	45147.4	1.56469	7.6671	0.46521	6.73586	3.77463	0.374561	3.74585	0.992376	2050.83	65.8026	2077.34	33.3845	2103.71	8.16536	2103.71	8.16536	97.4861
12ZA93-44 <>	346.172	6865.43	8.13491	15.2464	2.26756	0.958883	5.87689	0.106031	5.42181	0.922564	649.656	33.5067	682.717	29.2183	793.269	47.5888	649.656	33.5067	81.8961
12ZA93-45 <>	127.209	61840.6	2.19803	12.7429	0.82386	2.15362	1.67081	0.199038	1.45357	0.869978	1170.15	15.5546	1166.22	11.5861	1158.9	16.3386	1158.9	16.3386	100.971
12ZA93-46 <>	243.25	23337.5	1.96368	19.0378	3.56929	0.319842	3.79679	0.0441621	1.29453	0.340953	278.58	3.52948	281.781	9.34269	308.447	81.2961	278.58	3.52948	NA
12ZA93-47 <>	315.749	38417.1	1.46268	17.5218	1.50785	0.601425	2.49775	0.0764291	1.99127	0.797226	474.773	9.11428	478.138	9.52505	494.291	33.2596	474.773	9.11428	96.0512
12ZA93-48 <>	278.151	75185.9	2.87614	17.7644	1.57991	0.591837	2.76646	0.0762521	2.27094	0.820885	473.713	10.372	472.04	10.4441	463.921	35.0098	473.713	10.372	102.111
12ZA93-49 <>	188.97	23047.3	2.65536	13.6161	2.6909	1.6024	5.57347	0.158241	4.88084	0.875728	946.997	42.9873	971.145	34.8596	1026.17	54.4571	1026.17	54.4571	92.2844
12ZA93-50 <>	338.661	98352.2	1.66912	17.7548	1.4882	0.596045	2.29202	0.0767527	1.74317	0.760537	476.711	8.01005	474.721	8.69146	465.104	32.9702	476.711	8.01005	102.496
12ZA93-51 <>	413.893	184452	1.28667	16.6456	1.51584	0.796619	2.27582	0.0961721	1.69752	0.745893	591.937	9.60069	594.92	10.2465	606.29	32.7994	591.937	9.60069	97.6326
12ZA93-52 <>	165.654	29631.2	3.0879	17.4952	2.73961	0.622169	3.86301	0.0789454	2.72349	0.705017	489.825	12.8461	491.206	15.0453	497.637	60.3646	489.825	12.8461	98.4303
12ZA93-53 <>	282.5	199379	1.77317	13.4204	0.902507	1.78982	1.57331	0.17421	1.28872	0.819111	1035.27	12.3255	1041.76	10.2493	1055.43	18.1948	1055.43	18.1948	98.0898
12ZA93-54 <>	459.332	276391	3.45914	16.294	0.595203	0.899746	2.0897	0.106328	2.00315	0.958579	651.386	12.4107	651.592	10.0497	652.306	12.7744	651.386	12.4107	99.859
12ZA93-56 <>	342.429	63691.7	1.13539	17.7517	1.37436	0.587613	4.32198	0.0756538	4.09764	0.948093	470.128	18.5785	469.342	16.2441	465.496	30.4554	470.128	18.5785	100.995
12ZA93-58 <>	153.333	10565	1.29987	16.7292	3.34419	0.749848	4.44933	0.0909804	2.93478	0.6596	561.333	15.777	568.136	19.362	595.439	72.4945	561.333	15.777	94.2721
12ZA93-59 <>	385.073	139423	3.41773	12.0875	1.36203	1.9786	1.85232	0.173458	1.25537	0.67773	1031.13	11.9624	1108.24	12.4944	1262.87	26.592	1262.87	26.592	81.6499
12ZA93-60 <>	194.271	15461	1.88166	16.8503	2.25361	0.732456	3.30719	0.0895133	2.42048	0.731885	552.658	12.8196	557.993	14.1983	579.797	48.9428	552.658	12.8196	95.3192
12ZA93-61 <>	52.5527	14310.6	1.57882	18.7608	10.4368	0.56771	10.7808	0.0772463	2.70177	0.250609	479.665	12.4891	456.533	39.6609	341.686	236.841	479.665	12.4891	140.382
12ZA93-62 <>	511.408	60594	19.3677	18.7145	2.10634	0.316352	4.75914	0.0429385	4.26764	0.896725	271.022	11.3265	279.093	11.6138	347.285	47.6392	271.022	11.3265	NA
12ZA93-63 <>	280.482	41749.8	7.22053	17.1981	3.11373	0.508053	4.49504	0.0633707	3.24192	0.721222	396.092	12.4545	417.139	15.3776	535.244	68.1552	396.092	12.4545	NA
12ZA93-64 <>	253.324	55522.6	5.57384	17.1764	2.35043	0.727005	3.21416	0.0905665	2.19232	0.682083	558.887	11.7365	554.794	13.7394	538.026	51.4184	558.887	11.7365	103.877
12ZA93-65 <>	203.528	12317.9	0.812574	18.7445	4.91472	0.322082	5.24498	0.0437863	1.83176	0.349241	276.26	4.95353	283.503	12.9749	343.67	111.268	276.26	4.95353	NA
12ZA93-66 <>	200.847	29324.5	6.65491	8.73502	0.441115	5.23152	2.21719	0.331429	2.17287	0.980009	1845.31	34.8682	1857.77	18.9024	1871.73	7.95646	1871.73	7.95646	98.5884
12ZA93-67 <>	295.787	158469	2.72763	11.5444	0.581593	2.90243	1.4817	0.243015	1.36278	0.919744	1402.35	17.1752	1382.54	11.1901	1352.08	11.2204	1352.08	11.2204	103.718
12ZA93-69 <>	76.8305	28139.2	2.24602	11.271	1.27865	3.01515	6.61484	0.246474	6.49008	0.98114	1420.27	82.7332	1411.46	50.4794	1398.17	24.5115	1398.17	24.5115	101.58
12ZA93-70 <>	108.809	49492	2.04276	10.1627	0.810703	3.75055	0.965706	0.276441	0.524735	0.54337	1573.42	7.3259	1582.23	7.74166	1593.99	15.1403	1593.99	15.1403	98.7096
12ZA93-71 <>	177.384	20276	1.2088	19.1345	5.54902	0.339343	5.6523	0.047093	1.07559	0.190293	296.649	3.11843	296.674	14.5423	296.878	126.709	296.649	3.11843	NA
12ZA93-72 <>	169.888	4014.33	2.05031	14.4294	2.85514	1.2075	3.29807	0.126367	1.65089	0.500562	767.105	11.9396	804.04	18.3199	907.751	58.8106	767.105	11.9396	84.506
12ZA93-73 <>	192.183	21670.9	0.776328	19.3524	7.21476	0.292333	7.77456	0.0410309	2.89672	0.372589	259.22	7.3599	260.394	17.8589	270.958	165.587	259.22	7.3599	NA
12ZA93-74 <>	706.554	16580.3	2.70318	19.1477	2.34967	0.308435	2.45935	0.0428329	0.726259	0.295306	270.369	1.92297	272.967	5.88662	295.327	53.6575	270.369	1.92297	NA
12ZA93-75 <>	418.26	162164	14.5691	16.0302	1.14284	0.909309	1.42488	0.105718	0.851	0.597243	647.832	5.24509	656.69	6.8905	687.238	24.4074	647.832	5.24509	94.266
12ZA93-76 <>	289.315	127733	1.49417	16.2355	1.80118	0.893948	1.82856	0.105263	0.315228	0.172391	645.18	1.93532	648.488	8.76382	660.014	38.6303	645.18	1.93532	97.7524
12ZA93-77 <>	251.814	14968.4	0.657863	19.0703	6.07695	0.317066	6.13851	0.0438537	0.867177	0.141268	276.676	2.34851	279.643	15.0061	304.512	138.593	276.676	2.34851	NA
12ZA93-78 <>	124.211	14610.3	1.60742	17.4698	3.59734	0.609055	3.90791	0.0771689	1.52675	0.390682	479.202	7.05091	482.964	15.0208	500.883	79.2471	479.202	7.05091	95.6715
12ZA93-79 <>	119.864	12389.2	2.79907	13.7878	1.98773	1.63216	2.38173	0.163213	1.3121	0.550899	974.61	11.8681	982.691	14.997	1000.77	40.3474	1000.77	40.3474	97.3861
12ZA93-80 <>	66.4738	2949.67	1.32412	17.0733	18.2086	0.413184	18.2754	0.0511635	1.56121	0.0854269	321.661	4.89856	351.166	54.3068	551.195	400.512	321.661	4.89856	NA
12ZA93-81 <>	145.337	115107	1.28861	12.8583	1.53045	2.06393	1.86596	0.192476	1.06748	0.572082	1134.77	11.1072	1136.92	12.7635	1141.04	30.4512	1141.04	30.4512	99.4508
12ZA93-82 <>	143.883	55833.9	1.15874	13.5296	1.51161	1.80828	1.66008	0.17744	0.68623	0.413371	1052.97	6.66653	1048.46	10.8543	1039.04	30.5375	1039.04	30.5375	101.341
12ZA93-83 <>	126.513	76756.3	2.46688	9.85427	1.0788	3.56017	2.61779	0.254445	2.38516	0.911137	1461.36	31.1876	1540.7	20.7546	1651.33	19.9971	1651.33	19.9971	88.4962
12ZA93-84 <>	226.25	58658.3	8.76524	13.7485	0.926605	1.56687	1.74108	0.156239	1.47403	0.846617	935.839	12.84	957.188	10.7918	1006.56	18.7997	1006.56	18.7997	92.9742
12ZA93-86 <>	181.889	142258	5.86227	13.1506	0.957061	1.88575	2.21189	0.179856	1.99411	0.901543	1066.19	19.5959	1076.09	14.6774	1096.19	19.1387	1096.19	19.1387	97.2636
12ZA93-87 <>	634.626	119887	2.37302	19.3434	1.70411	0.295517	1.79659	0.0414584	0.568992	0.316707	261.867	1.46014	262.893	4.16122	272.023	39.0433	261.867	1.46014	NA
12ZA93-88 <>	343.964	3401.18	1.19317	18.8051	5.55071	0.336867	5.8109	0.0459445	1.71934	0.295882	289.575	4.86861	294.795	14.8688	336.374	125.858	289.575	4.86861	NA
12ZA93-89 <>	105.525	9651.3	0.665604	20.1293	15.4138	0.289399	15.7022	0.0422496	2.99547	0.190768	266.762	7.82771	258.086	35.7997	179.976	361.1	266.762	7.82771	NA
12ZA93-90 <>	168.821	94262.6	0.704127	20.7463	5.0582	0.27381	5.71696	0.0411991	2.66425	0.466025	260.261	6.7959	245.735	12.4785	109.166	119.49	260.261	6.7959	NA
12ZA93-91 <>	161.146	9480.39	1.1612	12.2176	1.16033	2.37028	2.86486	0.210032	2.61936	0.914307	1228.99	29.3093	1233.69	20.461	1241.92	22.7273	1241.92	22.7273	98.9588
12ZA93-93 <>	503.111	107912	1.92391	13.5099	0.706603	1.71207	2.33042	0.167754	2.22071	0.952924	999.724	20.5652	1013.06	14.9388	1041.98	14.2773	1041.98	14.2773	95.9445
12ZA93-94 <>	540.93	75116.5	3.43682	16.4422	3.37701	0.644518	4.64046	0.076859	3.18271	0.685862	477.347	14.6437	505.1	18.4686	632.857	72.7398	477.347	14.6437	75.4274
12ZA93-95 <>	77.534	33821.9	1.54116	16.3998	4.88439	0.918705	5.25481	0.109273	1.93797	0.368799	668.524	12.3066	661.675	25.5533	638.424	105.13	668.524	12.3066	104.715
12ZA93-96 <>	55.6983	11866.9	1.18601	21.2572	26.5455	0.486897	27.0028	0.0750656	4.94841	0.183255	466.603	22.2736	402.793	90.0183	51.4281	643.447	466.603	22.2736	907.291
12ZA93-97 <>	152.008	110859	2.79649	13.641	0.942542	1.75925	3.22584	0.174049	3.08507	0.956362	1034.38	29.483	1030.57	20.8867	1022.46	19.0764	1022.46	19.0764	101.166
12ZA93-98 <>	306.789	92268.5	1.43607	13.1038	0.881432	1.96918	2.47625	0.187146	2.31407	0.934503	1105.9	23.5165	1105.03	16.6768	1103.32	17.6393	1103.32	17.6393	100.234
12ZA93-99 <>	575.646	2211.96	0.657425	18.8132	3.2471	0.307667	3.49415	0.0419799	1.29051	0.369336	265.094	3.35169	272.371	8.34768	335.401	73.5937	265.094	3.35169	NA
12ZA93-100 <>	106.301	1400.71	0.704473	19.1046	11.4943	0.318268	11.8322	0.0440992	2.80733	0.237262	278.192	7.64364	280.569	29.0136	300.46	262.89	278.192	7.64364	NA
12ZA13-22	224.932	1056.4	0.775371	17.1092	3.6093	0.31264	4.5074	0.0387947	2.69993	0.598999	245.358	6.50001	276.225	10.9011	546.576	78.8744	245.358	6.50001	NA
12ZA13-12	471.028	829.706	0.972447	17.0555	2.78308	0.316291	3.61042	0.0391246	2.29991	0.63702	247.404	5.58228	279.046	8.80915	553.463	60.7413	247.404	5.58228	NA
12ZA13-10	447.185	2490.11	1.0638	18.1481	6.17035	0.31043	7.38515	0.0408595	4.05799	0.549479	258.159	10.2691	274.514	17.7658	416.352	137.958	258.159	10.2691	NA
12ZA13-61	81.7463	11324.7	0.896159	19.3092	13.2273	0.297378	14.9504	0.0416459	6.9681	0.466081	263.027	17.9591	264.35	34.8093	276.074	304.1	263.027	17.9591	NA
12ZA13-18	519.413	2448.72	0.828398	18.5952	3.20186	0.309462	3.55437	0.0417357	1.54325	0.434185	263.583	3.98571	273.764	8.52938	361.712	72.2353	263.583	3.98571	NA
12ZA13-21	497.17	62133.7	1.00951	18.9792	1.78853	0.303323	2.1335	0.0417524	1.16317	0.545193	263.686	3.00523	268.992	5.04172	315.426	40.6812	263.686	3.00523	NA
12ZA13-35	128.895	4045.33	0.892775	19.0133	8.51742	0.303018	8.87578	0.0417854	2.4966	0.281282	263.89	6.45526	268.755	20.9612	311.369	194.183	263.89	6.45526	NA
12ZA13-42	159.568	626.742	0.809232	16.119	8.31691	0.362141	10.487	0.0423366	6.38804	0.609137	267.3	16.7261	313.812	28.3173	675.456	178.085	267.3	16.7261	NA
12ZA13-69	391.186	2790.87	0.82363	18.5243	3.74337	0.316089	3.87718	0.0424669	1.00981	0.26045	268.106	2.65184	278.89	9.45546	370.324	84.3371	268.106	2.65184	NA
12ZA13-59	289.123	1484.96	0.688473	17.3983	12.7001	0.337089	12.8488	0.0425353	1.94903	0.15169	268.529	5.12621	294.964	32.9024	509.888	280.21	268.529	5.12621	NA
12ZA13-30	134.049	10053.7	0.661343	18.5862	7.6525	0.31862	8.05061	0.04295	2.50033	0.310576	271.092	6.63766	280.84	19.7545	362.802	172.787	271.092	6.63766	NA
12ZA13-8	142.479	20190.1	1.0308	18.1799	9.43386	0.326004	10.0232	0.0429846	3.38642	0.337856	271.307	8.99693	286.511	25.0268	412.437	211.319	271.307	8.99693	NA
12ZA13-16	418.205	13984.9	0.835697	18.7725	3.13409	0.316263	3.2555	0.0430595	0.880755	0.270544	271.77	2.34387	279.024	7.94259	340.31	70.9813	271.77	2.34387	NA
12ZA13-28	166.708	43370	0.836266	19.2541	5.08263	0.309102	5.32478	0.0431641	1.5875	0.298134	272.416	4.23449	273.484	12.7668	282.664	116.343	272.416	4.23449	NA
12ZA13-57	479.22	61902.4	1.03341	18.9539	1.3872	0.314328	3.37846	0.0432098	3.08053	0.911815	272.698	8.22534	277.53	8.20423	318.445	31.5436	272.698	8.22534	NA
12ZA13-7	451.031	12235.7	0.876328	19.1905	1.944	0.310982	2.92457	0.0432832	2.18494	0.747098	273.152	5.84353	274.941	7.04428	290.188	44.4198	273.152	5.84353	NA
12ZA13-66	259.657	18086.7	0.922564	19.0542	4.24189	0.313717	4.53229	0.0433538	1.59627	0.352199	273.588	4.27582	277.058	10.9901	306.458	96.658	273.588	4.27582	NA
12ZA13-67	431.523	3838.53	0.853832	18.6777	1.35358	0.321654	2.74308	0.0435724	2.38585	0.869772	274.939	6.42172	283.174	6.77868	351.749	30.5668	274.939	6.42172	NA
12ZA13-54	338.079	34773.5	0.974226	18.8889	2.74551	0.31808	3.56766	0.0435756	2.27824	0.63858	274.958	6.13249	280.425	8.74217	326.25	62.3199	274.958	6.13249	NA
12ZA13-9	169.873	5998.13	0.723911	18.8742	5.87605	0.321497	6.69507	0.0440092	3.20874	0.479269	277.636	8.71951	283.054	16.54	328.036	133.452	277.636	8.71951	NA
12ZA13-23	377.425	55655.6	0.814082	19.3974	1.74554	0.316498	2.20023	0.0445258	1.33945	0.608774	280.825	3.68075	279.205	5.37097	265.65	40.0479	280.825	3.68075	NA
12ZA13-48	345.885	19471.7	1.05136	18.8354	2.25095	0.329744	2.72036	0.0450453	1.52761	0.561547	284.031	4.24468	289.37	6.84969	332.733	51.0215	284.031	4.24468	NA
12ZA13-65	203.895	25135.2	0.598841	19.6656	5.02249	0.316567	5.13153	0.0451514	1.05223	0.205053	284.685	2.93037	279.258	12.5291	234.068	115.987	284.685	2.93037	NA
12ZA13-39	220.612	7430.37	0.8302	17.6934	11.1137	0.352178	11.5278	0.0451932	3.06189	0.265609	284.943	8.53463	306.358	30.4955	472.8	246.542	284.943	8.53463	NA
12ZA13-20	415.619	11205.1	0.964254	19.0969	1.45123	0.33199	1.76922	0.0459819	1.01195	0.571978	289.806	2.86776	291.084	4.47752	301.377	33.1135	289.806	2.86776	NA
12ZA13-68	342.701	1452.31	1.28799	17.205	11.9885	0.377375	12.0291	0.0470899	0.98694	0.0820461	296.63	2.86123	325.105	33.4766	534.363	263.283	296.63	2.86123	NA
12ZA13-55	148.965	11543.7	0.86984	19.3804	7.61953	0.335358	8.11887	0.0471379	2.80336	0.345289	296.926	8.13512	293.648	20.706	267.633	174.999	296.926	8.13512	NA
12ZA13-38	217.841	2819.02	0.79984	18.8064	10.5349	0.354088	11.4355	0.0482965	4.44806	0.388971	304.054	13.2106	307.791	30.3723	336.225	239.299	304.054	13.2106	NA
12ZA13-70	242.485	14035.7	2.01454	17.8341	3.50048	0.375167	4.34185	0.0485259	2.56873	0.59162	305.465	7.66356	323.476	12.028	455.252	77.7132	305.465	7.66356	NA
12ZA13-31	157.694	5806.88	0.354836	18.9018	5.90991	0.354169	6.25563	0.0485527	2.0508	0.327833	305.63	6.12159	307.852	16.6141	324.703	134.271	305.63	6.12159	NA
12ZA13-43	297.007	1458.89	1.10338	16.4416	5.88939	0.408812	8.65592	0.0487492	6.34351	0.732852	306.838	19.0084	348.019	25.5097	632.936	126.891	306.838	19.0084	NA
12ZA13-36	258.679	3086.83	0.594843	18.5774	8.00121	0.369119	8.2612	0.0497336	2.05619	0.248897	312.886	6.27989	319	22.6188	363.872	180.694	312.886	6.27989	NA
12ZA13-53	108.189	31799.2	1.83386	16.2609	5.76085	0.446715	6.45705	0.0526833	2.91653	0.451681	330.975	9.40937	374.976	20.2474	656.684	123.639	330.975	9.40937	NA
12ZA13-41	200.422	3409.06	0.619942	18.6885	9.05093	0.389778	11.1586	0.0528312	6.52643	0.58488	331.88	21.1119	334.207	31.7872	350.44	204.944	331.88	21.1119	NA
12ZA13-47	242.831	2722.71	0.571211	17.7516	7.64609	0.411424	7.80969	0.0529696	1.59012	0.203609	332.728	5.15656	349.9	23.1191	465.513	169.619	332.728	5.15656	NA
12ZA13-17	291.115	17928.3	4.53769	18.1082	1.65061	0.433265	3.11393	0.0569019	2.64046	0.847951	356.757	9.1641	365.492	9.55824	421.269	36.8624	356.757	9.1641	NA
12ZA13-5	87.453	1271.74	0.824895	17.0257	8.53669	0.507708	9.59209	0.0626929	4.37414	0.456016	391.982	16.635	416.906	32.8088	557.272	186.468	391.982	16.635	NA
12ZA13-15	191.736	45434.1	0.949915	17.2781	2.84996	0.526685	3.48274	0.066	2.0018	0.574777	412.012	7.98961	429.607	12.2004	525.084	62.4902	412.012	7.98961	78.466
12ZA13-60	323.878	3335.83	2.32867	17.6863	3.05864	0.523025	3.64469	0.0670902	1.98205	0.543818	418.601	8.03325	427.17	12.7095	473.691	67.6867	418.601	8.03325	88.3701
12ZA13-11	207.388	55448.7	2.31283	17.9469	1.76839	0.519273	2.3036	0.0675902	1.47627	0.640854	421.621	6.0251	424.666	7.99478	441.205	39.3418	421.621	6.0251	95.5612
12ZA13-6	147.071	25138.1	4.89324	17.5755	2.12835	0.548834	6.31395	0.0699595	5.94441	0.941473	435.911	25.0558	444.232	22.7216	487.565	46.9871	435.911	25.0558	89.4057
12ZA13-40	123.141	664.856	1.7557	14.9953	15.0928	0.659626	15.1274	0.0717385	1.02325	0.0676423	446.621	4.41535	514.385	61.1233	828.008	316.491	446.621	4.41535	53.9393
12ZA13-13	210.644	3675.48	2.86449	16.33	8.01165	0.645215	8.91029	0.076417	3.89958	0.437649	474.701	17.8462	505.53	35.4961	647.585	172.341	474.701	17.8462	73.3032
12ZA13-51	275.677	46865.4	2.28779	17.2879	1.63006	0.614437	2.32149	0.0770405	1.65293	0.712016	478.434	7.62186	486.354	8.97146	523.83	35.7459	478.434	7.62186	91.3337
12ZA13-34	166.984	38720.3	2.21285	15.0188	1.98227	0.713713	4.10938	0.0777426	3.59967	0.875964	482.634	16.7388	546.949	17.3794	824.759	41.3933	482.634	16.7388	58.5182
12ZA13-63	121.351	23033.1	2.00687	17.8371	3.23642	0.607212	3.70211	0.0785531	1.79756	0.485549	487.48	8.43961	481.8	14.2028	454.883	71.8635	487.48	8.43961	107.166
12ZA13-19	247.451	7465.35	1.59602	17.5876	2.02485	0.618092	2.23789	0.0788422	0.952968	0.425833	489.208	4.48949	488.651	8.68019	486.041	44.7222	489.208	4.48949	100.652
12ZA13-58	246.951	13550	3.20018	17.2552	2.43847	0.632603	4.2458	0.079168	3.47573	0.818628	491.155	16.4371	497.716	16.7063	528.029	53.4589	491.155	16.4371	93.0166
12ZA13-29	231.332	28759	5.1609	17.2595	1.90696	0.659077	2.30193	0.0825015	1.28934	0.560112	511.037	6.33461	514.049	9.28548	527.486	41.8	511.037	6.33461	96.8817
12ZA13-1	226.119	115132	1.59944	17.3507	1.73642	0.681963	1.96416	0.0858174	0.918034	0.467392	530.753	4.67731	527.96	8.08651	515.882	38.1564	530.753	4.67731	102.883
12ZA13-25	175.301	80071.3	1.51515	16.6629	2.14467	0.742849	2.68507	0.0897738	1.61555	0.601677	554.199	8.57929	564.067	11.6211	604.046	46.4169	554.199	8.57929	91.7478
12ZA13-27	326.718	59988.9	1.80653	17.0959	1.80608	0.724163	2.21147	0.0897899	1.2762	0.577081	554.295	6.77831	553.121	9.43152	548.316	39.4493	554.295	6.77831	101.09
12ZA13-32	240.902	9976.95	3.81006	16.3251	1.26895	0.760712	3.85093	0.0900688	3.63585	0.94415	555.944	19.3663	574.421	16.8954	648.238	27.254	555.944	19.3663	85.7623
12ZA13-3	574.147	46396.2	13.6949	16.8814	0.843738	0.753626	1.41403	0.0922704	1.13472	0.802472	568.951	6.17929	570.326	6.17039	575.814	18.3296	568.951	6.17929	98.808
12ZA13-24	350.122	8111.31	0.542894	15.4526	9.58852	0.829399	11.5036	0.0929528	6.35551	0.552481	572.977	34.8445	613.279	53.0044	765.038	202.454	572.977	34.8445	74.8952
12ZA13-56	183.815	6140.73	1.07176	17.213	3.38039	0.7567	3.85311	0.094467	1.84918	0.479919	581.901	10.289	572.104	16.8542	533.357	74.0295	581.901	10.289	109.102
12ZA13-46	111.183	32903.7	1.97726	14.3487	2.93252	1.18483	3.94063	0.123301	2.63228	0.667985	749.535	18.6261	793.56	21.702	919.334	60.3116	749.535	18.6261	81.5302
12ZA13-2	199.145	28216.1	1.07013	13.7418	0.71604	1.46594	2.08468	0.146102	1.95785	0.939161	879.076	16.0891	916.456	12.5842	1007.56	14.5085	1007.56	14.5085	87.2479
12ZA13-14	94.7894	68488	2.38735	13.6262	2.01913	1.774	2.30058	0.175319	1.10263	0.479283	1041.35	10.6028	1035.99	14.9399	1024.66	40.8551	1024.66	40.8551	101.629
12ZA13-44	320.223	44900	2.60136	13.5613	0.842775	1.74386	1.66828	0.171519	1.43976	0.863017	1020.47	13.5885	1024.89	10.7663	1034.32	17.0449	1034.32	17.0449	98.6609
12ZA13-37	155.79	77716.7	0.698892	12.1638	0.641343	2.53496	1.60333	0.223634	1.46947	0.916512	1301.05	17.3127	1282.13	11.675	1250.54	12.5422	1250.54	12.5422	104.039
12ZA26-38	297.897	664.846	2.45235	16.0317	13.2826	0.343259	15.4594	0.0399118	7.9099	0.511655	252.286	19.5702	299.638	40.1339	687.057	284.615	252.286	19.5702	NA
12ZA26-12	436.92	51549.4	13.1819	18.7147	2.64822	0.303884	5.05195	0.0412467	4.30223	0.851597	260.556	10.9862	269.429	11.9558	347.266	59.884	260.556	10.9862	NA
12ZA26-7	90.4167	26553.9	0.885438	15.9459	13.5302	0.36312	13.9451	0.041995	3.37651	0.242129	265.187	8.77238	314.542	37.737	698.498	289.413	265.187	8.77238	NA
12ZA26-9	522.146	3041.1	1.49381	18.4088	3.85853	0.316565	5.10175	0.0422656	3.33761	0.654209	266.861	8.72494	279.257	12.4564	384.397	86.725	266.861	8.72494	NA
12ZA26-61	382.596	9089.93	1.42243	18.8722	2.74298	0.311502	4.37987	0.0426366	3.41458	0.779606	269.155	9.00129	275.344	10.5633	328.302	62.2369	269.155	9.00129	NA
12ZA26-3	378.948	7183.31	0.864094	18.7905	1.72744	0.313006	2.81866	0.042657	2.22728	0.790193	269.281	5.87411	276.508	6.82283	338.096	39.133	269.281	5.87411	NA
12ZA26-5	435.171	1593.53	1.17086	16.9739	12.7479	0.347072	13.18	0.0427268	3.34734	0.253971	269.713	8.84193	302.516	34.4938	563.897	278.7	269.713	8.84193	NA
12ZA26-66	369.273	5867.95	1.03115	18.7979	3.82864	0.314186	3.91004	0.0428345	0.793684	0.202986	270.379	2.10157	277.42	9.49191	337.241	86.7464	270.379	2.10157	NA
12ZA26-19	330.438	2779.1	1.22306	18.1297	5.86905	0.326568	6.06753	0.0429402	1.53923	0.253682	271.032	4.08531	286.943	15.1677	418.613	131.154	271.032	4.08531	NA
12ZA26-28	267.613	1157.59	0.933978	17.4404	5.05372	0.341844	5.28027	0.0432398	1.5301	0.289777	272.883	4.08825	298.568	13.6596	504.536	111.265	272.883	4.08825	NA
12ZA26-42	523.65	13064.5	1.18884	18.8304	2.54239	0.31771	4.30945	0.04339	3.4796	0.807435	273.812	9.32806	280.14	10.5506	333.322	57.647	273.812	9.32806	NA
12ZA26-15	297.441	22978.9	1.53476	18.4046	5.44403	0.325148	5.99668	0.0434017	2.5145	0.419315	273.884	6.74257	285.855	14.9413	384.903	122.374	273.884	6.74257	NA
12ZA26-18	585.834	109371	1.74481	19.2335	2.00605	0.311593	2.36742	0.0434655	1.25716	0.531025	274.278	3.37579	275.415	5.71082	285.069	45.8785	274.278	3.37579	NA
12ZA26-44	315.691	17937.6	1.01645	19.2138	2.69034	0.312504	3.53537	0.0435478	2.29366	0.648776	274.787	6.17024	276.12	8.54731	287.455	61.5025	274.787	6.17024	NA
12ZA26-65	155.296	15146.4	0.960623	19.9113	6.41591	0.303269	6.754	0.0437951	2.11012	0.312425	276.314	5.70738	268.95	15.9595	205.315	148.958	276.314	5.70738	NA
12ZA26-17	271.06	4150.76	1.03455	18.1283	6.86246	0.333375	7.3319	0.0438318	2.58134	0.35207	276.54	6.9875	292.139	18.6155	418.788	153.426	276.54	6.9875	NA
12ZA26-21	377.234	2075.05	1.45494	16.9288	15.5305	0.358006	15.7085	0.0439557	2.35811	0.150117	277.306	6.40051	310.725	42.0727	569.729	339.844	277.306	6.40051	NA
12ZA26-14	335.935	3853.48	1.23192	17.5837	5.52462	0.345046	6.46641	0.0440033	3.36051	0.519687	277.6	9.13076	300.988	16.845	486.546	122.023	277.6	9.13076	NA
12ZA26-47	221.902	3254.1	0.710052	17.3481	9.78846	0.349816	10.1931	0.044014	2.84353	0.278966	277.666	7.72789	304.582	26.8289	516.201	215.404	277.666	7.72789	NA
12ZA26-13	428.927	20134.3	1.35085	18.3621	3.84231	0.330887	3.93925	0.0440657	0.868538	0.220483	277.985	2.36309	290.243	9.9448	390.102	86.2467	277.985	2.36309	NA
12ZA26-30	234.31	26868.3	0.843442	19.2425	3.35745	0.317845	5.41504	0.0443582	4.24855	0.784583	279.791	11.6328	280.243	13.2619	284.042	76.8071	279.791	11.6328	NA
12ZA26-8	40.276	6782.11	2.10343	25.1547	29.3257	0.243688	29.4192	0.0444582	2.34411	0.0796797	280.408	6.43217	221.436	58.5955	-366.89	773.452	280.408	6.43217	NA
12ZA26-11	145.703	6344.31	1.42465	17.9693	5.78426	0.341893	5.93443	0.0445574	1.3266	0.223543	281.02	3.64793	298.605	15.3538	438.43	128.83	281.02	3.64793	NA
12ZA26-32	314.071	40668.7	1.69303	19.3341	3.13985	0.318394	3.25593	0.0446465	0.861637	0.264636	281.57	2.37389	280.666	7.98423	273.119	71.9748	281.57	2.37389	NA
12ZA26-34	379.777	2357.6	1.15005	18.4735	4.12753	0.333853	4.70472	0.0447306	2.25786	0.479913	282.089	6.23182	292.503	11.9573	376.502	92.899	282.089	6.23182	NA
12ZA26-63	280.363	30486.4	1.46653	19.2433	3.52198	0.321503	3.61094	0.0448706	0.796598	0.220607	282.953	2.20525	283.058	8.92026	283.936	80.5775	282.953	2.20525	NA
12ZA26-68	220.724	7036.56	1.41625	18.5133	7.28816	0.338824	7.5983	0.0454944	2.14871	0.282789	286.8	6.02745	296.281	19.5277	371.658	164.29	286.8	6.02745	NA
12ZA26-55	370.986	25159	1.44062	18.8904	3.55414	0.339011	5.04757	0.0464465	3.58414	0.710073	292.668	10.2551	296.422	12.9767	326.087	80.7031	292.668	10.2551	NA
12ZA26-1	274.903	10913.6	0.867253	18.7551	3.23178	0.343257	3.35577	0.0466915	0.903793	0.269325	294.177	2.599	299.637	8.7075	342.387	73.1682	294.177	2.599	NA
12ZA26-27	141.663	40282	1.0346	19.0987	7.67962	0.338323	8.74588	0.0468634	4.18495	0.478505	295.236	12.0768	295.9	22.453	301.168	175.333	295.236	12.0768	NA
12ZA26-46	840.537	4678.79	2.38582	18.1493	6.65812	0.359945	6.73023	0.0473799	0.982596	0.145997	298.416	2.86539	312.173	18.0892	416.204	148.927	298.416	2.86539	NA
12ZA26-40	332.433	10259.7	1.56975	18.8489	6.11778	0.351263	8.72202	0.0480194	6.21663	0.712751	302.351	18.3621	305.671	23.0258	331.106	138.844	302.351	18.3621	NA
12ZA26-39	152.653	34494.7	1.37206	19.6394	4.73757	0.338466	4.96019	0.0482104	1.46932	0.296222	303.525	4.35638	296.008	12.7367	237.123	109.308	303.525	4.35638	NA
12ZA26-25	223.689	2420.27	0.582074	17.8602	12.2359	0.374429	12.4903	0.0485013	2.50825	0.200816	305.314	7.47953	322.931	34.5636	451.972	272.614	305.314	7.47953	NA
12ZA26-53	232.308	25383	1.81715	18.9416	4.96475	0.357114	5.26427	0.0490592	1.75036	0.332498	308.743	5.27674	310.057	14.0665	319.975	112.876	308.743	5.27674	NA
12ZA26-4	205.623	726.184	0.802955	16.9973	14.3183	0.399061	14.4343	0.0491947	1.82637	0.12653	309.576	5.52039	340.967	41.8288	560.914	313.51	309.576	5.52039	NA
12ZA26-62	122.513	3781.55	0.8847	17.2731	12.3023	0.401213	12.3663	0.0502626	1.25597	0.101564	316.134	3.87475	342.528	35.9684	525.71	270.637	316.134	3.87475	NA
12ZA26-29	97.4444	27229.1	1.78922	17.688	6.56474	0.473289	6.67834	0.060716	1.22655	0.183661	379.979	4.52593	393.458	21.7873	473.456	145.341	379.979	4.52593	NA
12ZA26-59	298.329	1198.3	1.58195	14.0634	4.92245	0.647285	6.84465	0.0660214	4.75591	0.694836	412.141	18.9877	506.806	27.3157	960.498	100.65	412.141	18.9877	42.9091
12ZA26-R33	132.724	52706.8	1.1385	18.4304	3.86548	0.502101	4.02366	0.0671157	1.11711	0.277635	418.755	4.52926	413.124	13.6575	381.761	86.8994	418.755	4.52926	109.69
12ZA26-R33	141.838	65903.6	1.03532	17.994	4.04725	0.516718	4.1644	0.0674341	0.980796	0.235519	420.678	3.99425	422.957	14.4065	435.374	90.1571	420.678	3.99425	96.6247
12ZA26-R33	260.923	58083.4	0.795635	18.298	1.95642	0.512485	2.11353	0.0680117	0.799643	0.378345	424.166	3.28263	420.119	7.27169	397.941	43.8428	424.166	3.28263	106.59
12ZA26-49	375.561	74531.2	1.63548	17.2805	1.82188	0.561155	5.54154	0.0703297	5.23348	0.944411	438.141	22.1683	452.278	20.2281	524.77	39.9325	438.141	22.1683	83.4921
12ZA26-41	553.991	11651.5	6.6264	16.808	9.35536	0.599592	9.43507	0.0730922	1.22383	0.129711	454.758	5.3737	476.975	35.9255	585.292	203.456	454.758	5.3737	77.6976
12ZA26-37	357.163	12285	1.00844	17.0272	4.72097	0.617463	4.79885	0.0762522	0.861036	0.179425	473.714	3.93258	488.256	18.6034	557.094	103.006	473.714	3.93258	85.033
12ZA26-45	172.771	15597.1	2.1687	17.3915	2.78201	0.622884	2.89001	0.0785677	0.782655	0.270814	487.568	3.67524	491.653	11.2633	510.723	61.1818	487.568	3.67524	95.4662
12ZA26-20	152.717	6792.07	1.07657	16.0476	8.42088	0.682186	8.57148	0.0793981	1.59971	0.186631	492.529	7.58555	528.095	35.3093	684.951	180.037	492.529	7.58555	71.9072
12ZA26-26	103.904	13089.4	1.13643	17.5302	5.5723	0.645269	5.73346	0.0820401	1.34985	0.235434	508.288	6.59762	505.563	22.8362	493.232	122.936	508.288	6.59762	103.053
12ZA26-33	227.99	33388.6	1.25664	17.3085	2.02927	0.657817	2.29441	0.0825775	1.07068	0.466649	511.489	5.2648	513.278	9.24444	521.227	44.5317	511.489	5.2648	98.1317
12ZA26-69	372.037	2857.02	0.895574	16.2042	6.33827	0.704141	6.52272	0.0827532	1.54022	0.236132	512.535	7.58853	541.261	27.3727	664.183	135.875	512.535	7.58853	77.1678
12ZA26-57	186.786	47909.4	1.09983	17.2361	2.7265	0.671986	3.57321	0.0840036	2.30954	0.64635	519.976	11.5375	521.919	14.583	530.455	59.7347	519.976	11.5375	98.0244
12ZA26-52	138.198	2723.61	2.63113	15.6303	11.5808	0.761127	11.7126	0.0862827	1.75249	0.149624	533.515	8.97337	574.66	51.4426	740.893	245.752	533.515	8.97337	72.0097
12ZA26-50	196.699	2764.19	3.48118	16.6248	4.57102	0.723264	5.65867	0.0872073	3.33562	0.58947	538.999	17.2479	552.592	24.1197	608.988	98.8431	538.999	17.2479	88.5074
12ZA26-10	256.75	212156	51.1817	16.9611	0.875268	0.75713	1.12497	0.0931371	0.706734	0.628222	574.063	3.8817	572.353	4.92201	565.544	19.081	574.063	3.8817	101.506
12ZA26-58	269.03	144496	1.46407	16.7437	1.27736	0.795123	1.74091	0.0965573	1.18285	0.679441	594.202	6.71431	594.074	7.8299	593.604	27.6664	594.202	6.71431	100.101
12ZA26-31	98.5646	117858	1.23932	12.2306	1.0757	2.47625	1.67701	0.219654	1.28656	0.767176	1280.05	14.9366	1265.12	12.1302	1239.81	21.0854	1239.81	21.0854	103.245

## Sheet: DR3.U-Pb DZ LAICPMS (UCSC) data
Sample ID	Pb204_CPS	U238 ppm	Th232 ppm	Th/U	207/235	±2σ	206/238	±2σ	Error Corr.	238/206	±2σ	207/206	±2σ	ErrorCorr.	207/235 Age (Ma)	±2σ (Ma)	206/238 Age (Ma)	±2σ (Ma)	207/206 Age (Ma)	±2σ (Ma)	Concord.	Comment
13ZA68_1	9	403.6	738	1.82854	0.323	0.016	0.0422	0.002	0.25709	23.6967	1.12307	0.0553	0.0014	0.22409	285	12	266	13	426	55	0.0666667
13ZA68_2	3	406	202	0.497537	0.33	0.018	0.046	0.0023	0.42091	21.7391	1.08696	0.0523	0.0016	0.10605	289	13	290	14	280	66	-0.00346021
13ZA68_3	20	270	115	0.425926	0.475	0.023	0.0614	0.0029	0.3657	16.2866	0.769239	0.0558	0.0012	0.08994	394	16	384	18	445	49	0.0253807
13ZA68_4	65	37.6	11.76	0.312766	1.017	0.07	0.0953	0.0047	0.19406	10.4932	0.517502	0.0782	0.0044	0.053737	703	35	587	28	1070	110	0.165007
13ZA68_5	45	407.6	245.4	0.602061	0.325	0.016	0.0437	0.0021	0.28781	22.8833	1.09966	0.0547	0.0013	0.18157	286	12	275	13	392	54	0.0384615
13ZA68_6	9	110.2	104.2	0.945554	0.33	0.017	0.0449	0.0022	0.15702	22.2717	1.09126	0.0536	0.0017	0.24843	289	13	283	13	351	68	0.0207612
13ZA68_7	2	211.2	137.48	0.650947	0.299	0.015	0.0411	0.002	0.11273	24.3309	1.18399	0.0526	0.0014	0.27384	266	11	260	12	311	59	0.0225564
13ZA68_8	7	296.6	185.4	0.625084	0.328	0.019	0.0385	0.0019	0.28204	25.974	1.28184	0.0617	0.0022	-0.065581	287	15	244	12	631	74	0.149826
13ZA68_9	62	224.2	252	1.124	0.376	0.02	0.0456	0.0022	0.33262	21.9298	1.05802	0.0605	0.0018	0.06388	324	14	288	13	604	64	0.111111
13ZA68_10	75	343	215	0.626822	0.472	0.029	0.0608	0.0029	0.22293	16.4474	0.784496	0.0571	0.0024	0.037469	391	19	381	18	470	91	0.0255754
13ZA68_11	33	211	121	0.57346	0.321	0.016	0.045	0.0022	0.35539	22.2222	1.08642	0.0521	0.0015	0.13121	283	13	284	13	292	61	-0.00353357
13ZA68_12	44	456	147.06	0.3225	0.307	0.014	0.0429	0.002	0.30978	23.31	1.08671	0.0528	0.0011	0.2135	272	11	270	13	313	48	0.00735294
13ZA68_13	18	65.4	31.5	0.481651	0.578	0.031	0.0743	0.0036	0.092628	13.4589	0.652116	0.0578	0.0019	0.33502	464	20	462	22	486	73	0.00431034
13ZA68_14	13	298.2	253	0.848424	0.313	0.016	0.0422	0.002	0.31892	23.6967	1.12307	0.0548	0.0016	0.27154	277	12	267	13	385	67	0.0361011
13ZA73_6	32	350.6	177.4	0.50599	0.331	0.016	0.0421	0.002	0.23756	23.753	1.12841	0.0576	0.0014	0.22748	290	12	266	12	508	52	0.0827586
13ZA73_7	12	69.34	18.88	0.272282	2.082	0.098	0.1854	0.0089	0.40451	5.39374	0.258923	0.0825	0.0019	0.21492	1145	31	1096	49	1257	43	0.0427948
13ZA73_9	408	568	311.6	0.548592	0.454	0.027	0.0371	0.0018	-0.55634	26.9542	1.30775	0.0909	0.0042	0.70581	378	19	235	11	1310	100	0.378307	disc, hi 204
13ZA73_10	8	393.8	205.6	0.522092	5.88	0.26	0.338	0.016	0.75074	2.95858	0.140051	0.1266	0.0021	0.23986	1958	38	1879	77	2050	29	0.0403473
13ZA73_11	50	1129.8	6.26	0.0055408	0.687	0.031	0.0839	0.0039	0.40317	11.919	0.554039	0.0597	0.0012	0.41501	531	19	520	23	592	44	0.0207156
13ZA73_12	21	339.4	69.38	0.20442	0.545	0.025	0.0684	0.0032	0.39791	14.6199	0.683971	0.0583	0.0012	0.25073	441	16	426	20	535	45	0.0340136
13ZA73_13	18	105.24	68.2	0.648043	0.643	0.031	0.0808	0.0039	0.33877	12.3762	0.597368	0.058	0.0015	0.21384	505	19	501	23	528	58	0.00792079
13ZA73_14	-5	26.46	39.58	1.49584	1.6	0.084	0.1543	0.0075	0.35584	6.48088	0.315014	0.0759	0.0024	0.16121	967	32	924	42	1099	65	0.0444674
13ZA73_15	525	1.66	2.158	1.3	121.4	8.7	1.073	0.086	0.91646	0.931966	0.0746963	0.83	0.026	0.46816	4835	71	4590	260	5030	60	0.0506722	hi 204, older than the age of Earth, 238 too low
13ZA73_16	288	497	408	0.820926	0.421	0.027	0.0419	0.002	0.552	23.8664	1.13921	0.0727	0.0033	-0.43369	351	18	264	12	910	77	0.247863	disc, hi 204
13ZA73_17	632	7.96	43.4	5.45226	27	1.6	0.268	0.017	0.77687	3.73134	0.23669	0.738	0.023	0.25533	3370	58	1524	85	4828	51	0.547774	disc, hi 204
13ZA73_18	5	8.94	0.0102	0.00114094	0.753	0.06	0.0897	0.0049	0.14071	11.1483	0.608991	0.0618	0.0046	0.40862	554	35	553	29	520	140	0.00180505
13ZA73_19	3	431.4	446.6	1.03523	0.27	0.013	0.038	0.0018	0.40539	26.3158	1.24654	0.052	0.0012	0.12232	243	10	240	11	272	50	0.0123457
13ZA73_20	-9	381.6	235.4	0.616876	0.519	0.024	0.067	0.0032	0.49622	14.9254	0.712854	0.0568	0.0011	0.10294	424	16	418	19	478	45	0.0141509
13ZA73_21	63	203	212.2	1.04532	5.15	0.23	0.27	0.013	0.71731	3.7037	0.178326	0.1391	0.0024	0.17095	1845	38	1539	65	2215	30	0.165854
13ZA73_22	73	306.8	168.9	0.550522	0.312	0.016	0.0405	0.0019	0.44906	24.6914	1.15836	0.0561	0.0018	0.1106	277	13	256	12	438	71	0.0758123
13ZA73_23	61	401.2	311	0.775174	0.339	0.016	0.0444	0.0021	0.15997	22.5225	1.06525	0.0558	0.0015	0.44769	297	12	280	13	429	62	0.0572391
13ZA73_24	17				no value	NAN	no value	NAN	NaN			no value	NAN	NaN	no value	NAN	no value	NAN	no value	NAN
13ZA73_25	59	234.8	48.8	0.207836	1.698	0.078	0.1659	0.0079	0.55263	6.02773	0.287035	0.0742	0.0015	0.18656	1008	30	989	44	1049	40	0.0188492
13ZA73_26	31	219.4	60.72	0.276755	1.599	0.073	0.1541	0.0073	0.63758	6.48929	0.30741	0.0752	0.0014	0.052704	970	29	924	41	1073	38	0.0474227
13ZA73_27	478	689	400	0.580552	2.006	0.092	0.1296	0.0063	0.69253	7.71605	0.375086	0.1117	0.002	0.4423	1117	30	785	36	1828	31	0.297225	disc, hi 204
13ZA73_28	436	3.36	7.58	2.25595	47.2	3.2	0.454	0.031	0.94444	2.20264	0.150401	0.745	0.02	0.20213	3886	62	2370	130	4837	45	0.390118	disc, hi 204
13ZA73_29	11	220.6	186.2	0.844062	0.306	0.015	0.0414	0.002	0.22345	24.1546	1.16689	0.0529	0.0014	0.25503	271	12	262	12	315	58	0.0332103
13ZA73_30	135	610	1320	2.16393	0.323	0.018	0.0377	0.0018	0.18741	26.5252	1.26646	0.0607	0.0024	0.061573	285	14	238	11	593	78	0.164912
13ZA73_31	4	254.6	187.6	0.736842	0.306	0.015	0.0415	0.002	0.32285	24.0964	1.16127	0.0525	0.0013	0.23673	270	11	262	12	307	53	0.0296296
13ZA73_32	5	641.8	379.4	0.59115	0.275	0.013	0.0372	0.0018	0.33375	26.8817	1.30073	0.0536	0.0011	0.29981	247	10	235	11	344	48	0.048583
13ZA73_33	61	482.8	128.4	0.265949	0.532	0.025	0.0654	0.0031	0.44976	15.2905	0.72478	0.0587	0.0012	0.15631	433	16	409	19	556	44	0.0554273
13ZA73_34	100	134	125.8	0.938806	0.403	0.021	0.039	0.0019	0.13445	25.641	1.24918	0.0738	0.0024	0.34766	343	15	247	12	1059	65	0.279883	disc, hi 204
13ZA73_35	8	49.78	91.4	1.83608	1.619	0.079	0.1595	0.0077	0.34792	6.26959	0.30267	0.0734	0.0019	0.2582	975	30	954	43	1021	52	0.0215385
13ZA74_1	42	372	332.2	0.893011	0.32	0.012	0.0429	0.001	0.39581	23.31	0.543357	0.0547	0.0013	0.044117	282.7	8.8	270.6	6.4	397	51	0.0428016
13ZA74_2	2	376	213.2	0.567021	0.326	0.012	0.0455	0.0012	0.53205	21.978	0.57964	0.053	0.0013	0.061212	286.7	9.6	286.8	7.2	322	55	-0.000348797
13ZA74_3	26	207.6	164.4	0.791908	0.929	0.034	0.1072	0.0028	0.5816	9.32836	0.243651	0.0629	0.0013	0.13281	667	17	657	16	700	45	0.0149925
13ZA74_4	46	156.8	78.8	0.502551	1.835	0.062	0.179	0.0045	0.54599	5.58659	0.140445	0.0755	0.0015	0.2314	1058	22	1061	25	1086	40	-0.00283554
13ZA74_5	39	692.4	262.4	0.378972	0.315	0.011	0.0438	0.001	0.45922	22.8311	0.521257	0.0528	0.0011	-0.0080343	277.8	8.1	276.2	6.4	316	46	0.00575954
13ZA74_6	32	512.6	338.8	0.660944	0.301	0.01	0.0429	0.001	0.31345	23.31	0.543357	0.0514	0.0011	0.27729	267.5	7.8	271	6.3	256	46	-0.0130841
13ZA74_7	42	251.6	210	0.834658	0.296	0.011	0.0417	0.001	0.29618	23.9808	0.575079	0.0517	0.0013	0.16861	263.6	8.4	263	6.4	260	55	0.00227618
13ZA74_8	21	187.4	233.6	1.24653	1.692	0.058	0.1704	0.0044	0.50319	5.86855	0.151535	0.0721	0.0015	0.26346	1004	21	1014	24	986	41	-0.00996016
13ZA74_9	19	264.2	170.6	0.645723	0.308	0.011	0.0447	0.0011	0.16624	22.3714	0.550526	0.0505	0.0014	0.26605	272.1	8.8	281.7	6.6	214	59	-0.0352811
13ZA74_10	67	2184	483	0.221154	0.571	0.018	0.0734	0.0018	0.60449	13.624	0.334103	0.05662	0.00095	0.28023	459	11	457	11	476	36	0.0043573
13ZA74_11	38	559.6	286.8	0.512509	0.3	0.01	0.0427	0.0011	0.26229	23.4192	0.603305	0.0511	0.0012	0.19756	266.6	8.1	269.4	6.5	240	52	-0.0105026
13ZA74_12	46	1160	426.4	0.367586	0.355	0.011	0.0491	0.0011	0.34934	20.3666	0.456278	0.05269	0.00097	0.17264	307.9	8.3	308.8	7	315	42	-0.00292303
13ZA74_13	58	348	308	0.885057	0.337	0.012	0.0431	0.0011	0.39571	23.2019	0.592159	0.0568	0.0014	0.098553	294.5	9.2	272.3	6.5	458	55	0.075382
13ZA74_14	24	160.6	61.4	0.382316	0.929	0.033	0.1075	0.0028	0.33304	9.30233	0.242293	0.0625	0.0016	0.19051	667	18	658	16	696	55	0.0134933
13ZA74_15	-9	611	75.54	0.123633	1.883	0.058	0.1836	0.0043	0.72614	5.44662	0.127562	0.0748	0.0012	0.11167	1075	20	1087	24	1063	32	-0.0111628
13ZA74_16	24	145.6	121.4	0.833791	0.315	0.013	0.0447	0.0011	0.13546	22.3714	0.550526	0.0509	0.0018	0.23778	278	10	282	7	235	70	-0.0143885
13ZA74_17	28	705.6	442.6	0.627268	0.2977	0.0097	0.0417	0.001	0.37711	23.9808	0.575079	0.0515	0.0011	0.2222	264.3	7.5	263.2	6.2	254	45	0.00416194
13ZA74_18	23	356.2	65.18	0.182987	2.08	0.064	0.1955	0.0046	0.76742	5.11509	0.120355	0.0771	0.0013	0.10839	1142	21	1151	25	1120	32	-0.00788091
13ZA74_19	38	628.6	375.2	0.596882	0.312	0.01	0.0439	0.001	0.44972	22.779	0.518885	0.0514	0.001	0.15827	275.9	7.9	277.2	6.5	255	45	-0.00471185
13ZA74_20	56	3094	33.26	0.0107498	0.627	0.019	0.081	0.0019	0.85617	12.3457	0.28959	0.05584	0.00086	0.044336	494	12	502	11	445	34	-0.0161943
13ZA74_21	10	466	274.2	0.588412	0.315	0.011	0.0451	0.0011	0.43102	22.173	0.540804	0.0504	0.0011	0.090816	278.4	8.3	284.5	6.6	212	48	-0.0219109
13ZA74_22	93	347	189.8	0.546974	0.528	0.018	0.0631	0.0015	0.28921	15.8479	0.376732	0.0605	0.0014	0.18469	430	12	394.5	9.2	611	49	0.0825581
13ZA74_23	27	121.6	55.6	0.457237	1.005	0.039	0.1067	0.0027	0.35405	9.37207	0.237156	0.0674	0.0019	0.13463	704	20	653	16	861	55	0.0724432
13ZA74_24	47	168.6	107.2	0.635824	0.32	0.013	0.0425	0.0011	0.14364	23.5294	0.608997	0.0552	0.0018	0.24591	283	10	268	6.5	401	70	0.0530035
13ZA74_25	321	765.6	384.2	0.501829	0.499	0.021	0.0472	0.0011	0.73615	21.1864	0.493752	0.076	0.0024	-0.56209	408	15	297.3	6.9	1067	65	0.271324	disc, hi 204
13ZA74_26	45	728	216	0.296703	0.322	0.011	0.0441	0.0011	0.54248	22.6757	0.565608	0.0531	0.0012	-0.14578	282.9	8.3	278.1	6.5	314	46	0.0169671
13ZA74_27	57	538	423	0.786245	1.865	0.058	0.183	0.0043	0.62827	5.46448	0.1284	0.0741	0.0012	0.1764	1068	20	1083	24	1049	33	-0.0140449
13ZA74_28	38	466.8	334.6	0.716795	0.305	0.011	0.0436	0.0011	0.37689	22.9358	0.578655	0.0504	0.0012	0.11675	269.5	8.2	275.3	6.5	210	51	-0.0215213
13ZA74_29	43	228.6	125.4	0.548556	1.912	0.059	0.1873	0.0044	0.47106	5.33903	0.125423	0.0743	0.0013	0.20421	1085	21	1107	24	1052	35	-0.0202765
13ZA74_30	20	730	600	0.821918	0.3101	0.0099	0.04157	0.00099	0.26824	24.0558	0.572895	0.0541	0.0011	0.30655	275.1	7.7	262.5	6.2	368	46	0.0458015
13ZA74_31	26	112.8	33.44	0.296454	1.488	0.054	0.1539	0.004	0.42675	6.49773	0.168882	0.0709	0.0017	0.14905	924	23	924	22	955	49	0
13ZA74_32	67	884	1068.2	1.20837	0.328	0.011	0.0433	0.001	0.50596	23.0947	0.533365	0.0557	0.0012	-0.31838	287.6	8.5	273.3	6.2	419	48	0.0497218
13ZA74_33	31	257.8	167.6	0.650116	0.332	0.012	0.044	0.0011	0.24152	22.7273	0.568182	0.0551	0.0015	0.089036	289.9	9.5	277.7	6.6	389	59	0.0420835
13ZA74_34	316	1084	61.6	0.0568266	0.981	0.045	0.1038	0.0027	0.8157	9.63391	0.250593	0.068	0.0019	-0.53664	689	22	636	16	863	58	0.0769231	hi 204
13ZA74_35	44	1010	355.6	0.352079	0.335	0.012	0.0464	0.0012	0.53921	21.5517	0.557372	0.0526	0.0011	0.23544	293.7	8.8	292.5	7.7	313	49	0.0040858
13ZA74_36	-1	337.2	151.8	0.450178	0.404	0.014	0.0544	0.0013	0.20623	18.3823	0.439284	0.0547	0.0013	0.25238	345	10	341.7	7.9	382	52	0.00956522
13ZA74_37	40	247.6	201.4	0.813409	0.871	0.028	0.1029	0.0024	0.42014	9.71817	0.226663	0.062	0.0012	0.18026	636	15	631	14	675	41	0.00786164
13ZA74_38	32	393	323.8	0.823919	0.323	0.011	0.0448	0.0011	0.33205	22.3214	0.548071	0.0529	0.0013	0.16413	284.3	8.7	282.4	6.7	314	54	0.00668308
13ZA74_39	450	1554	434	0.279279	6.71	0.22	0.3622	0.0096	0.87174	2.76091	0.073177	0.135	0.0021	0.18845	2073	28	1995	45	2163	27	0.0376266	hi 204
13ZA74_40	5	374.4	55.18	0.147382	1.161	0.038	0.1244	0.003	0.55768	8.03858	0.193857	0.0676	0.0013	0.15722	783	18	756	17	863	41	0.0344828
13ZA74_41	22	294.4	242.6	0.824049	0.319	0.011	0.0435	0.001	0.18107	22.9885	0.528471	0.053	0.0013	0.27853	280.9	8.5	274.4	6.4	328	54	0.0231399
13ZA74_42	53	227.4	133.2	0.585752	2.724	0.083	0.2283	0.0054	0.50099	4.3802	0.103605	0.0871	0.0015	0.29302	1335	23	1325	28	1358	34	0.00749064
13ZA74_43	80	717.4	250.4	0.349038	0.34	0.012	0.0439	0.0011	0.34501	22.779	0.570773	0.0565	0.0014	0.23002	296.4	9	276.9	6.7	457	55	0.0657895
13ZA74_44	9	596.8	179.76	0.301206	1.643	0.052	0.1598	0.0039	0.75565	6.25782	0.152725	0.0745	0.0012	0.12425	986	20	955	22	1058	34	0.0314402
13ZA74_45	149	887.4	678.2	0.764255	0.366	0.012	0.0454	0.0011	0.10945	22.0264	0.53368	0.0583	0.0014	0.31606	316.1	9.2	286.2	6.7	541	53	0.0945903	hi 204
13ZA74_46	98	179	88.4	0.493855	8.29	0.27	0.3707	0.0093	0.90192	2.6976	0.0676765	0.1615	0.0026	-0.26966	2260	29	2032	43	2471	27	0.100885
13ZA74_47	25	578.6	465.8	0.805047	0.313	0.01	0.0436	0.001	0.29811	22.9358	0.52605	0.0523	0.0011	0.19703	276.5	7.9	275.2	6.3	290	46	0.00470163
13ZA74_48	133	161.6	92.54	0.572649	8.86	0.32	0.409	0.011	0.74402	2.44499	0.0657576	0.1558	0.0028	-0.3684	2313	34	2210	53	2405	30	0.0445309	hi 204
13ZA74_49	-12	1122	547.8	0.488235	0.3163	0.0099	0.0441	0.001	0.43496	22.6757	0.514189	0.05194	0.00094	0.096597	278.9	7.8	278.3	6.3	281	43	0.00215131
13ZA74_50	636	2018	766	0.379584	0.508	0.02	0.0505	0.0012	0.62139	19.802	0.470542	0.0723	0.0022	-0.39794	416	14	317.5	7.3	959	61	0.236779	disc, hi 204
13ZA74_51	-19	604.4	2.858	0.00472866	0.763	0.024	0.0939	0.0022	0.52369	10.6496	0.249512	0.0588	0.0011	0.0927	578	14	579	13	557	39	-0.0017301
13ZA74_52	65	840.2	576.4	0.686027	0.325	0.01	0.0434	0.001	0.30738	23.0415	0.53091	0.0538	0.001	0.16185	285.3	8	273.6	6.3	357	43	0.0410095
13ZA74_53	41	493.6	583.2	1.18152	0.297	0.0099	0.0419	0.001	0.39193	23.8664	0.569603	0.0511	0.0011	0.066131	263.6	7.7	264.7	6.2	237	46	-0.00417299
13ZA74_54	18	74.4	44.54	0.598656	1.763	0.061	0.1763	0.0043	0.4427	5.67215	0.138345	0.0731	0.0017	0.032343	1030	22	1046	24	1016	43	-0.015534
13ZA74_55	152	228.2	186	0.815074	0.503	0.03	0.0445	0.0012	0.60142	22.4719	0.605984	0.0824	0.004	-0.29627	412	20	280.3	7.6	1239	91	0.31966	disc, hi 204
13ZA74_56	38	598.4	397	0.663436	0.3031	0.0098	0.0426	0.001	0.26774	23.4742	0.551037	0.0514	0.001	0.20473	268.5	7.6	269.1	6.2	258	46	-0.00223464
13ZA74_57	28	386	148.4	0.384456	0.659	0.021	0.0833	0.002	0.31638	12.0048	0.288231	0.0573	0.0011	0.22504	515	13	516	12	494	43	-0.00194175
13ZA74_58	64	158	56	0.35443	0.889	0.031	0.0953	0.0023	0.41167	10.4932	0.253246	0.0678	0.0016	0.073591	645	17	587	14	847	49	0.0899225
13ZA74_59	189	384.8	110.4	0.286902	1.03	0.034	0.1054	0.0026	0.51638	9.48767	0.234041	0.0706	0.0014	0.20952	718	17	646	15	950	40	0.100279	disc, hi 204
13ZA74_60	20	243.6	62.32	0.255829	1.403	0.048	0.1306	0.0033	0.59175	7.65697	0.193476	0.077	0.0016	0.049385	891	20	791	19	1119	42	0.112233
13ZA74_61	58	573.2	198.4	0.346127	0.553	0.017	0.0714	0.0017	0.40327	14.0056	0.333467	0.0564	0.0011	0.19443	447	11	445	10	464	41	0.00447427
13ZA74_62	105	1404	2248	1.60114	0.353	0.011	0.0457	0.0011	0.59388	21.8818	0.526696	0.0556	0.0011	-0.15188	306.3	8.4	288	6.5	438	42	0.0597453	hi 204
13ZA74_63	27	628	84.6	0.134713	1.131	0.035	0.1265	0.0029	0.68061	7.90514	0.181225	0.0649	0.0011	-0.032753	768	17	768	17	768	34	0
13ZA74_64	109	729.6	470.4	0.644737	0.384	0.013	0.0473	0.0011	0.30754	21.1416	0.491666	0.0597	0.0012	0.14898	330.1	9.5	298.1	6.9	583	44	0.0969403	hi 204
13ZA74_65	35	284.8	339.6	1.19242	0.307	0.011	0.0418	0.001	0.17697	23.9234	0.572331	0.0534	0.0014	0.22664	271.6	8.6	264.2	6.3	327	56	0.0272459
13ZA74_66	71	297.4	66.06	0.222125	1.187	0.042	0.1222	0.0032	0.59517	8.18331	0.214293	0.0707	0.0015	0.17281	794	19	743	18	939	45	0.0642317
13ZA74_67	-12	83.2	9.36	0.1125	0.794	0.042	0.0912	0.003	0.5925	10.9649	0.360688	0.0629	0.0024	0.01244	592	24	564	17	683	86	0.0472973
13ZA74_68	15	170.06	83.72	0.492297	1.958	0.064	0.185	0.0044	0.4308	5.40541	0.128561	0.0769	0.0016	0.14919	1100	22	1095	24	1117	41	0.00454545
13ZA74_69	22	987.6	684.2	0.692791	0.3121	0.0098	0.0437	0.001	0.29929	22.8833	0.523645	0.052	0.00095	0.19368	275.6	7.6	275.4	6.3	280	42	0.000725689
13ZA74_70	-17	478.4	102.8	0.214883	1.218	0.037	0.128	0.003	0.51037	7.8125	0.183106	0.0693	0.0011	0.19223	809	17	776	17	909	34	0.0407911
13ZA74_71	52	132.16	71.74	0.542827	0.779	0.029	0.086	0.0022	0.29145	11.6279	0.297458	0.0661	0.0018	0.22589	585	17	532	13	819	57	0.0905983
13ZA74_72	13	138	65.28	0.473043	0.307	0.013	0.0423	0.0011	0.20328	23.6407	0.614769	0.0534	0.0018	0.17373	272	10	266.9	6.6	341	69	0.01875
13ZA74_73	20	578	612	1.05882	0.309	0.01	0.0426	0.001	0.3673	23.4742	0.551037	0.0526	0.0011	0.064616	273.2	8	268.7	6.3	310	44	0.0164714
13ZA74_74	67	320.6	135.6	0.422957	0.659	0.022	0.0785	0.0018	0.36031	12.7388	0.292101	0.0614	0.0013	0.087921	513	13	487	11	647	45	0.0506823
13ZA74_75	51	896	424.2	0.473438	0.327	0.01	0.0457	0.0011	0.47558	21.8818	0.526696	0.05231	0.00094	0.094064	287.4	7.9	288.2	6.6	292	41	-0.00278358
13ZA74_76	-12	429.4	285.8	0.66558	0.315	0.01	0.0429	0.001	0.27614	23.31	0.543357	0.0539	0.0012	0.20913	277.8	8	270.7	6.3	354	49	0.025558
13ZA74_77	17	2044	802.4	0.392564	0.3109	0.0094	0.0438	0.001	0.5406	22.8311	0.521257	0.05211	0.00085	0.077209	275.2	7.3	276.1	6.2	286	38	-0.00327035
13ZA74_78	22	323.2	179.4	0.555074	1.539	0.048	0.1533	0.0036	0.53993	6.52316	0.153186	0.0733	0.0013	0.17417	946	20	920	20	1020	36	0.0274841
13ZA74_79	17	183.8	113.4	0.616975	0.685	0.023	0.0845	0.002	0.22748	11.8343	0.280102	0.059	0.0013	0.25093	530	14	523	12	560	50	0.0132075
13ZA74_80	24	843.2	405.4	0.480787	0.3008	0.0095	0.04209	0.00098	0.25527	23.7586	0.553182	0.05245	0.00096	0.22941	266.9	7.4	265.8	6.1	295	42	0.00412139
13ZA74_81	29	101.4	55.62	0.548521	4.46	0.14	0.3058	0.0074	0.51178	3.27011	0.0791328	0.1069	0.0018	0.18882	1725	26	1720	37	1747	31	0.00289855
13ZA74_82	0	938	81.8	0.0872068	0.582	0.018	0.0751	0.0017	0.37022	13.3156	0.301418	0.05677	0.00095	0.28072	465	11	467	11	481	37	-0.00430108
13ZA74_83	89	952	35.04	0.0368067	0.748	0.023	0.0893	0.0021	0.57604	11.1982	0.26334	0.0611	0.001	0.12451	567	14	552	12	640	36	0.026455
13ZA74_84	8	133.2	46.72	0.350751	0.759	0.026	0.0923	0.0023	0.12025	10.8342	0.269975	0.0604	0.0015	0.34555	572	16	569	13	615	55	0.00524476
13ZA74_85	12	420.8	138.4	0.328897	0.718	0.023	0.0881	0.0021	0.38484	11.3507	0.270562	0.0593	0.0011	0.22739	549	14	544	12	578	41	0.00910747
13ZA74_86	-2	231.8	301.4	1.30026	0.304	0.011	0.0423	0.0011	0.19258	23.6407	0.614769	0.0523	0.0014	0.26967	268.5	8.7	266.8	6.6	292	58	0.00633147
13ZA74_87	9	222.6	73.4	0.329739	2.094	0.065	0.196	0.0047	0.45064	5.10204	0.122345	0.0775	0.0013	0.26823	1147	21	1154	25	1132	35	-0.00610288
13ZA74_88	0	576	278	0.482639	0.657	0.021	0.083	0.0019	0.41707	12.0482	0.275802	0.0576	0.001	0.18714	512	13	514	12	511	40	-0.00390625
13ZA74_89	32	409.4	294.8	0.720078	0.332	0.011	0.0438	0.0011	0.27381	22.8311	0.573383	0.055	0.0013	0.19088	291	8.6	276.2	6.5	403	50	0.0508591
13ZA74_90	7	846	324.4	0.383452	0.346	0.011	0.0475	0.0011	0.58416	21.0526	0.487535	0.0528	0.001	0.010762	301	8.3	298.9	7	310	43	0.00697674
13ZA74_91	12	311.8	354.4	1.13663	0.304	0.011	0.0431	0.0011	0.21188	23.2019	0.592159	0.0511	0.0013	0.23137	269.3	8.3	271.9	6.5	244	53	-0.00965466
13ZA74_92	27	447	114.2	0.255481	1.777	0.054	0.1741	0.004	0.53883	5.74383	0.131966	0.0734	0.0012	0.20421	1037	20	1035	22	1025	33	0.00192864
13ZA74_93	-29	1330	35.84	0.0269474	0.983	0.029	0.1158	0.0027	0.58179	8.63558	0.201348	0.06075	0.00098	0.19757	696	15	706	15	633	34	-0.0143678
13ZA74_94	6	631.8	279.8	0.442862	0.3034	0.0098	0.0428	0.001	0.31748	23.3645	0.545899	0.05082	0.00099	0.18565	269.6	7.7	269.9	6.3	230	44	-0.00111276
13ZA74_95	-10	357.6	165.2	0.461969	0.579	0.02	0.0745	0.0017	0.39543	13.4228	0.306293	0.0554	0.0012	0.019235	463	13	463	10	419	49	0
13ZA74_96	25	118	47.14	0.399492	0.907	0.035	0.1071	0.0027	0.42976	9.33707	0.235388	0.0606	0.0016	0.070397	654	18	656	16	622	55	-0.0030581
13ZA74_97	31	797.4	196.2	0.24605	0.3002	0.0097	0.04251	0.00099	0.21867	23.5239	0.547839	0.0509	0.0011	0.28081	266.3	7.5	268.4	6.1	227	46	-0.00788584
13ZA74_98	42	147.8	140.4	0.949932	0.369	0.015	0.0446	0.0011	0.17679	22.4215	0.552997	0.0595	0.0019	0.22364	318	11	281.2	7	553	68	0.115723
13ZA74_99	16	926	493.8	0.533261	0.325	0.01	0.0446	0.0011	0.4716	22.4215	0.552997	0.0525	0.001	0.14486	286.6	8.1	281.2	6.5	303	43	0.0188416
13ZA74_100	-1	157.86	95.44	0.604586	0.59	0.021	0.0757	0.0019	0.16806	13.21	0.33156	0.0563	0.0015	0.26944	473	14	470	11	471	57	0.00634249
13ZA74_101	97	634.8	259	0.408003	0.689	0.022	0.0823	0.0019	0.28578	12.1507	0.280514	0.0603	0.0011	0.34318	532	13	510	11	616	40	0.0413534
13ZA74_102	139	1018.6	486.8	0.477911	0.386	0.012	0.0465	0.0011	0.33203	21.5054	0.508729	0.0602	0.0012	0.15125	331.8	9.2	293.1	6.7	607	42	0.116637	hi 204
13ZA74_103	57	142.2	90.2	0.634318	0.516	0.022	0.0499	0.0013	0.37102	20.0401	0.522086	0.0764	0.0027	-0.00084493	421	14	314.1	7.8	1096	68	0.253919	disc
13ZA74_104	320	371.2	331	0.891703	0.661	0.033	0.0489	0.0012	0.6095	20.4499	0.501838	0.0979	0.0039	-0.44906	510	20	307.9	7.3	1556	76	0.396275	disc, hi 204
13ZA74_105	40	579.4	207.8	0.358647	0.323	0.01	0.0454	0.0011	0.39854	22.0264	0.53368	0.05193	0.00099	0.13785	283.6	8	286.2	6.6	277	43	-0.00916784
13ZA74_106	20	88.96	65.88	0.740558	1.147	0.041	0.1247	0.0032	0.34359	8.01925	0.205787	0.0676	0.0016	0.25637	776	19	758	18	846	52	0.0231959
13ZA74_107	-8	129.14	88.6	0.686077	0.304	0.013	0.0438	0.0011	0.0062397	22.8311	0.573383	0.0506	0.0018	0.34853	269	10	276	6.9	231	73	-0.0260223
13ZA74_108	40	82.8	58.4	0.705314	0.882	0.038	0.0977	0.0025	0.53708	10.2354	0.261909	0.0653	0.0019	-0.32664	634	18	601	15	742	61	0.0520505
13ZA74_109	22	503.6	227	0.450755	0.319	0.01	0.0435	0.001	0.34926	22.9885	0.528471	0.0534	0.0011	0.15251	280.9	8.1	274.5	6.4	338	45	0.0227839
13ZA74_110	15	297	262.6	0.884175	0.324	0.012	0.0447	0.0011	0.15776	22.3714	0.550526	0.053	0.0013	0.31881	284.8	8.9	281.7	6.7	329	54	0.0108848

## Sheet: DR4.UTM Locations 
	WGS1984 Datum		( E )	( S )	Volcanic tuffs		Detrital sandstones
	Sample ID	Zone	Easting	Northing	U-Pb SHRIMP age	LAICPMS age	LAICPMS age
	09LBC01						X
	09LGC-04	34H	499614	6321821
	12ZA05B	34H	468362	6339683	X
	12ZA07	34H	405027	6393983	X
	12ZA08	34H	404351	9374562	X	X
	12ZA10	34H	404352	63494738	X	X
	12ZA13						X
	12ZA16	34H	438007	6414177	X	X
	12ZA18	34H	443935	6419135	X
	12ZA19	34H	643534	6333624	X
	12ZA22A&B	34H	643542	6334491	X
	12ZA26						X
	12ZA23	34H	643558	6334551	X
	12ZA45	35H	467444	6345581	X
	12ZA46	35H	466973	6345303	X
	12ZA54	35H	465066	6324815	X
	12ZA55	35H	465184	6324766	X
	12ZA60	35H	464923	6325655	X	X
	12ZA61	35H	463796	6328315	X
	13ZA67	35H	464802	6325212	X
	13ZA68						X
	13ZA72A	35H	465441	6361597	X
	13ZA74						X
	13ZA75B	35H	466981	6345320	X
	13ZA76	35H	467384	6345555	X
	13ZA91						X
	13ZA93	34H	456880	6397502	X		X
	14ZA116A	34H	498466	6322788	X
	14ZA121	34H	461573	6331369	X
	14ZA130A	34H	560632	6428940	X
	14ZA142	34H	373774	6265469	X
	14ZA154	35H	464299	6326517	X
	14ZA161A	35H	484158	6404712	X
	14ZA162A	35H	481244	6401608
	14ZA168A	35H	271276	6441037	X
	BLOUKRANS	34H	492420	6343593	X
	SUTHER	34H	465375	6412116	X
					(From McKay et al., 2015; 2016)
